# Supplementary material for: Korea Heart Disease Fact Sheet 2020: Analysis of Nationwide Data
Source: PubMed Central journal article supplement — Korean Circ J. 2021 May 17;51(6):495–503. doi: 10.4070/kcj.2021.0097 (PMC8176075; doi:10.4070/kcj.2021.0097), 2021-05-17
Supplement: kcj-51-495-s005.pdf [file kcj-51-495-s005.pdf]

# HEART DISEASE FACT SHEET 2020

순환기질환에 의한 사망 현황 / 순환기질환으로 인한 입원 현황 / 주요 순환기질환 위험요인 유병 현황

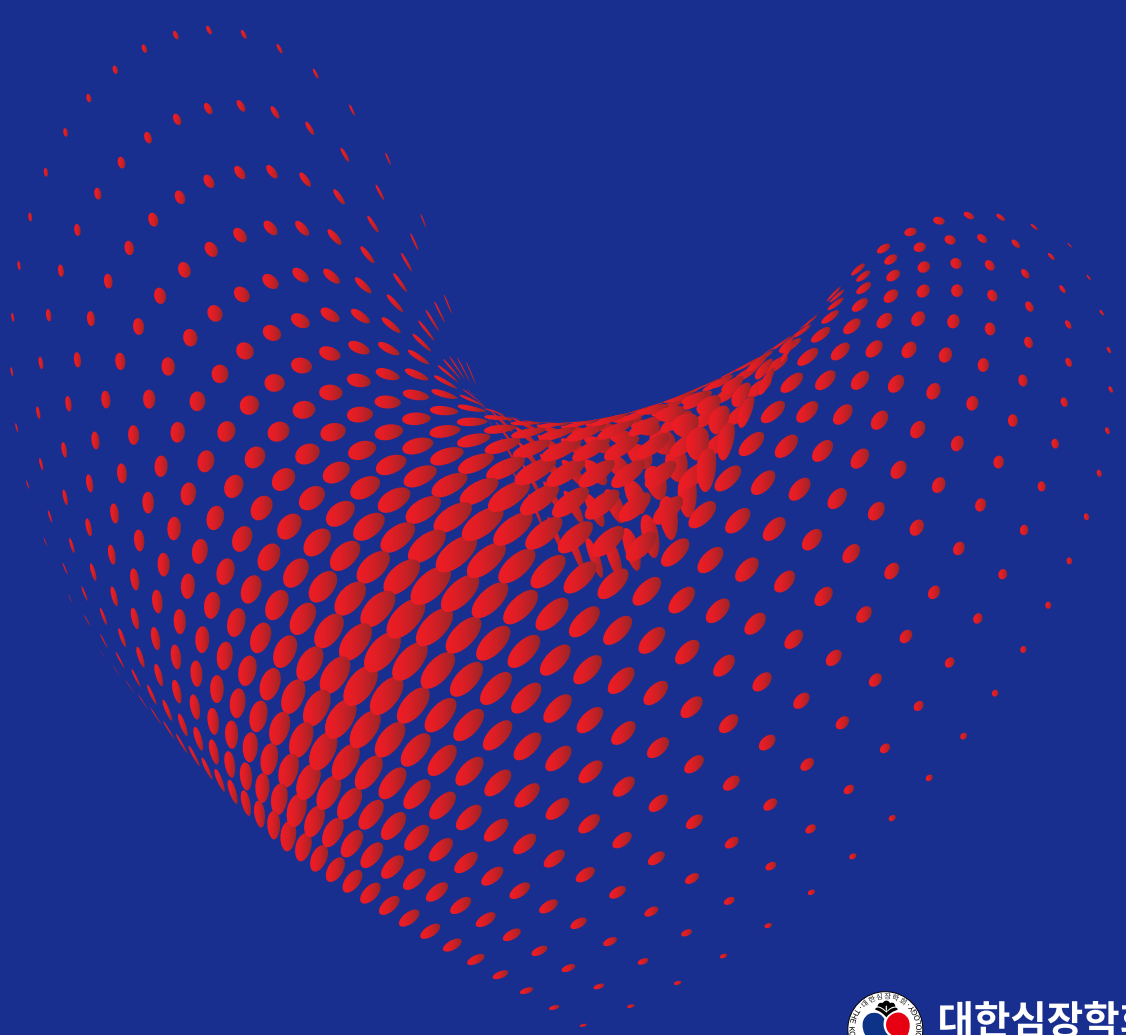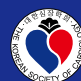

대한심장학회  
The Korean Society of Cardiology

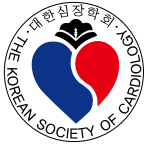

## 임원진 명단

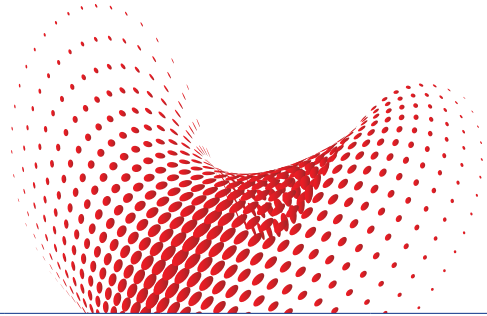

### 대한심장학회 임원진

|        |     |          |     |
|--------|-----|----------|-----|
| 회장     | 승기배 | 이사장      | 김기식 |
| 총무이사   | 강석민 | 재무이사     | 김동수 |
| 학술이사   | 권현철 | 간행이사     | 안영근 |
| 연구이사   | 배장호 | 교육수련이사   | 나승운 |
| 보험이사   | 전동운 | 홍보이사     | 홍그루 |
| 의료정보이사 | 정욱진 | 대외협력이사   | 송재관 |
| 정책이사   | 김용진 | 윤리이사     | 신동구 |
| 진료지침이사 | 박성욱 | KCJ편집위원장 | 장양수 |

### 의료정보위원

|     |     |     |     |     |     |     |
|-----|-----|-----|-----|-----|-----|-----|
| 권성욱 | 김경희 | 김대희 | 김지희 | 김현숙 | 나진오 | 박상민 |
| 박재형 | 변영섭 | 유승기 | 이선화 | 이승표 | 임상엽 | 조현재 |
| 최정현 | 최진오 | 한주용 | 홍순준 |     |     |     |

### 연구위원

|     |     |     |     |     |     |     |
|-----|-----|-----|-----|-----|-----|-----|
| 강태수 | 김수중 | 박만원 | 박성미 | 윤현주 | 이상엽 | 정우영 |
| 천우정 | 최웅길 | 최유정 | 한승환 | 황석재 |     |     |

### Heart Disease Fact Sheet 2020 집필진

|     |     |     |     |     |     |     |
|-----|-----|-----|-----|-----|-----|-----|
| 김지희 | 김현창 | 박성미 | 배장호 | 백종민 | 이혁희 | 이호규 |
| 정욱진 | 조소미 | 허지은 |     |     |     |     |

**HEART DISEASE  
FACT SHEET 2020**

발행일 2020년 10월 16일  
발행인 김기식

ISBN 979-11-90483-08-7(93510)

## 발간사

심혈관질환은 전세계 사망원인 1위를 차지하는 매우 중요한 질환이며, 우리나라에서도 인구 고령화 및 생활습관 변화로 심혈관질환의 부담이 더욱 커지고 있습니다. 하지만 적절한 예방과 관리를 통해 심혈관질환의 발생 및 사망을 크게 줄일 수 있는 만큼, 효과적인 심혈관질환의 예방 및 관리 대책 수립이 중요한 시점입니다.

대한심장학회는 1957년 창립 이후 눈부신 발전을 거듭하여 우리나라의 심혈관질환 관리를 세계 최고 수준으로 끌어올리는데 크게 공헌하였습니다. ‘미래를 위해 심혈관 건강 증진에 앞장선다’는 미션을 가지고 심혈관질환 예방 및 관리의 양적·질적 향상을 위해 구체적이고 실현가능한 전략들을 수립하였으며, 리더십, 책임감, 창의성 및 소통이라는 네 가지 핵심가치 아래 정부, 유관기관, 언론 및 관련 학회들과 함께 이를 추진해 나가고 있습니다.

대한심장학회는 우리나라의 심혈관질환 현황에 대한 지속적인 모니터링이 필요하다고 판단하여 전국민을 대표하는 주요 보건의로 빅데이터를 분석해 Heart Disease Fact Sheet를 발간하게 되었습니다. 이는 우리나라의 전체 순환기질환 및 주요 심혈관질환의 사망, 입원 및 위험요인 현황을 객관적 데이터로 보여주는 자료로, 정부기관과 보건의로 전문가들이 심혈관질환에 대한 예방 및 관리대책을 수립하고 그 효과를 평가하는 데 중요한 기초 자료로 활용될 수 있을 것입니다. 또한 이를 계기로 심혈관질환 역학연구와 임상연구들이 더욱 활성화되어 질병예방과 국민건강 증진에도 기여할 수 있기를 소망합니다.

Heart Disease Fact Sheet 작성을 위하여 방대한 데이터를 분석하고 해석한 대한심장학회 의료정보위원회 및 연구위원회의 노력에 깊은 감사를 포함합니다. 또한 팩트시트의 근간이 되는 소중한 자료를 제공해주신 질병관리청과 국민건강보험공단, 그리고 통계청에도 감사의 인사를 올립니다.

대한심장학회 회장  
승기배

대한심장학회 이사장  
김기식

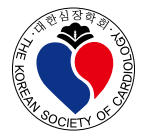

---

# HEART DISEASE FACT SHEET 2020

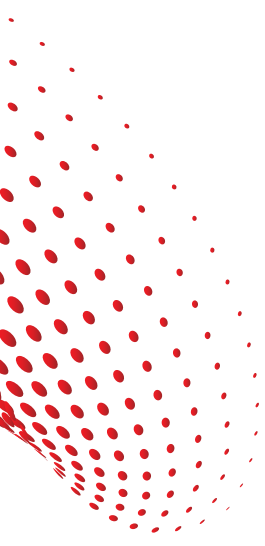

## **A** 순환기질환에 의한 사망 현황

- 4 전체순환기질환 및 주요 심혈관질환 사망자 수, 사망률 변화
- 6 전체순환기질환 사망률 변화
- 8 심장질환 사망률 변화
- 10 허혈성심질환 사망률 변화
- 12 심근경색증 사망률 변화
- 14 심부전 사망률 변화
- 16 고혈압 사망률 변화
- 18 뇌혈관질환 사망률 변화

## **B** 순환기질환으로 인한 입원 현황

- 22 전체순환기질환, 심장질환 및 뇌혈관질환 입원환자 수 변화
- 24 전체순환기질환 및 주요 심혈관질환 입원율 변화
- 26 전체순환기질환 및 주요 심혈관질환 연령표준화 입원율 변화

## **C** 주요 순환기질환 위험요인 유병 현황

- 29 주요 순환기질환 위험요인 유병자 수 현황 (2018년)
- 30 성·연령별 주요 순환기질환 위험요인 개수 (2018년)
- 32 고혈압 유병률 변화
- 34 당뇨병 유병률 변화
- 36 고콜레스테롤혈증 유병률 변화
- 38 이상지질혈증 유병률 변화
- 40 비만 유병률 변화
- 42 현재 흡연을 변화
  
- 44 Heart Disease Fact Sheet 작성 방법

HEART DISEASE  
FACT SHEET 2020

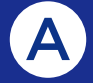

# 순환기질환에 의한 사망 현황

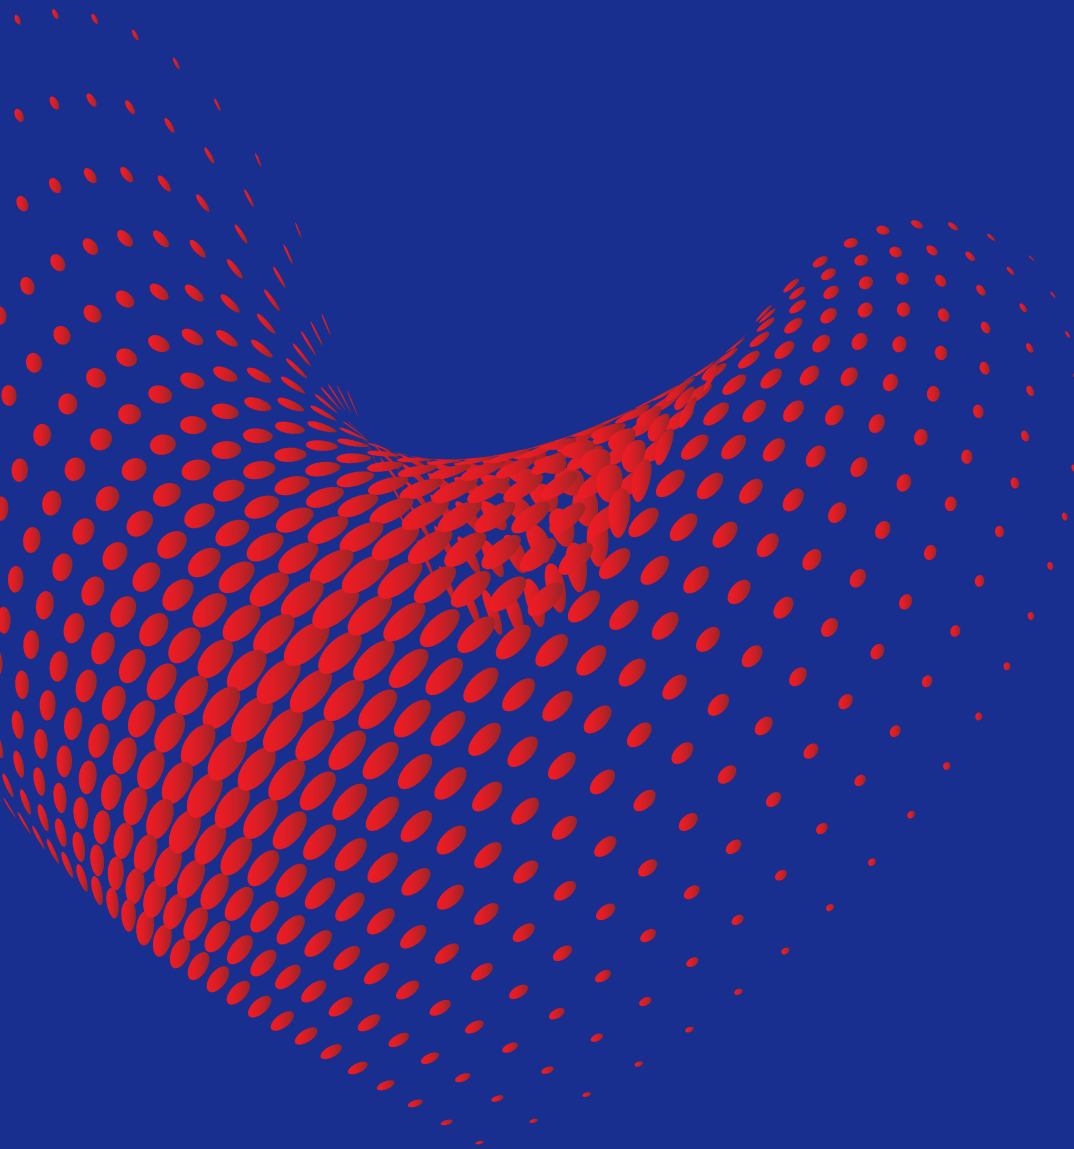

## 전체순환기질환 및 주요 심혈관질환 사망자수 변화

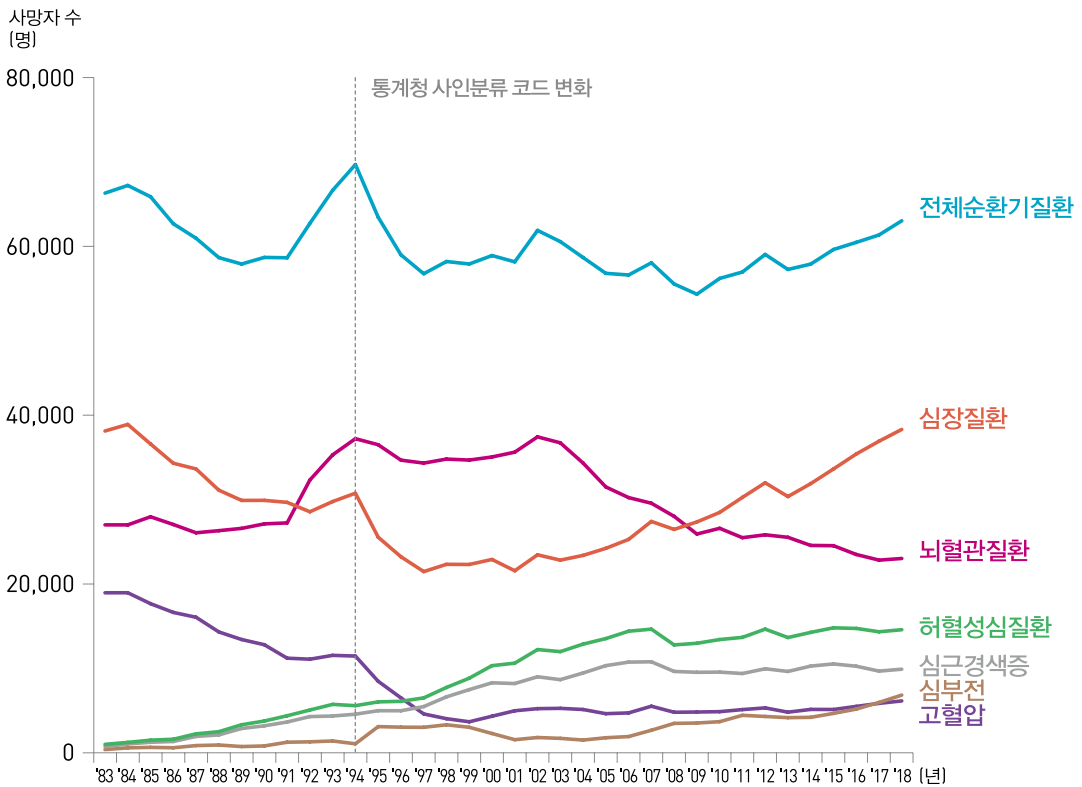

- 최근 5년간 전체순환기질환 및 심장질환 사망자 수는 증가 추세이나, 뇌혈관질환 사망자 수는 감소 추세를 보임
- 심장질환 사망자 수의 증가는 허혈성심질환 및 심부전의 영향이 크며, 이 외에 전도장애 및 심장성 부정맥 (I44-I49)의 영향 또한 큰 것으로 판단됨

## 전체순환기질환 및 주요 심혈관질환 사망률 변화

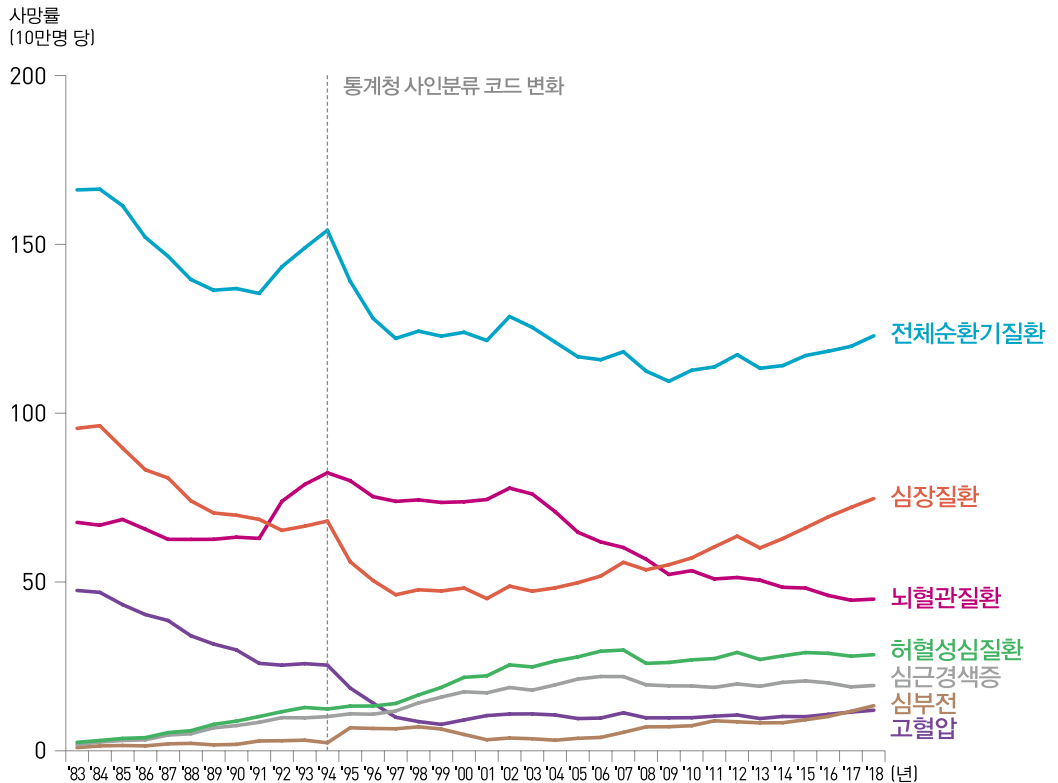

- 전체순환기질환에 의한 사망률은 1980년대에 비해 전반적으로 감소하였으나, 최근 5년 사이에는 다시 증가하는 추세를 보임

· 자료원: 통계청 사망원인통계 (1983-2018)

· 대상자: 전 연령 주민등록인구 (일부 신원미상자 포함)

· 분석 내용: 연도별 전체순환기질환 및 주요 심혈관질환에 의한 사망자 수 및 사망률을 계산함

· 사인 코드: 전체순환기질환 (I00-I99), 심장질환 (I00-I13, I20-I51), 허혈성심질환 (I20-I25), 심근경색증 (I21-I23), 심부전 (I50), 고혈압 (I10-I13), 뇌혈관질환 (I60-I69)

## 전체순환기질환 사망률 변화 (전체연령)

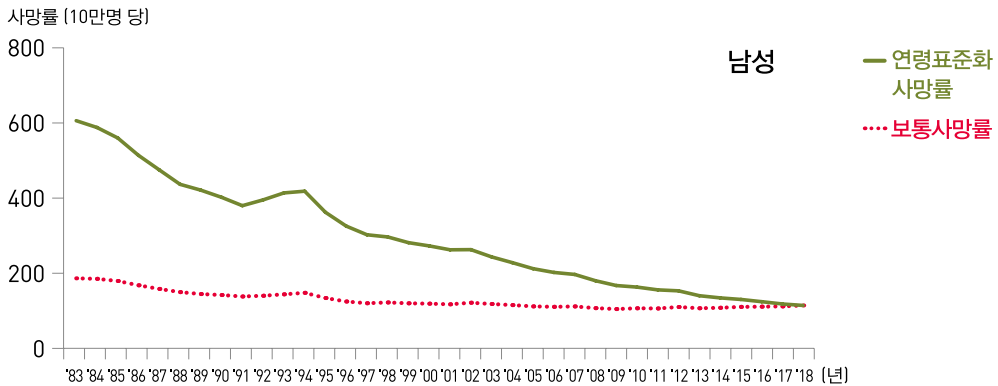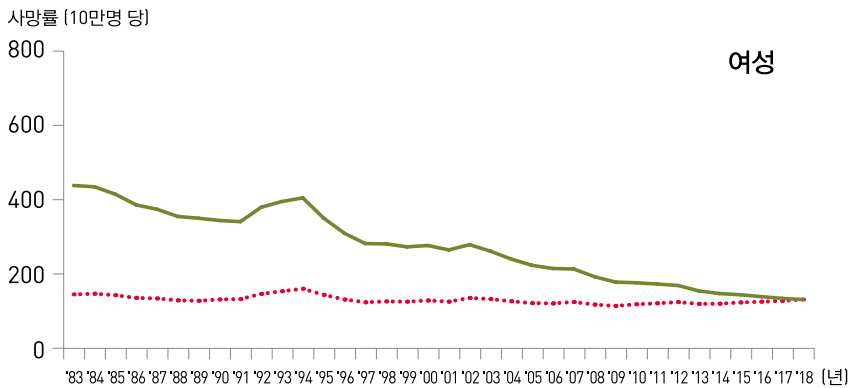

- 전체순환기질환의 보통사망률 및 연령표준화 사망률은 모두 감소 추세이며, 연령표준화 사망률이 더 빠르게 감소하고 있음
- 남성: 1983-2018년 사이 10만명당 연령표준화 사망률은 81% 감소 (608 → 115), 보통사망률은 39% 감소 (187 → 115) 하였음
- 여성: 1983-2018년 사이 10만명당 연령표준화 사망률은 70% 감소 (438 → 131), 보통사망률은 10% 감소 (145 → 131)하였음

· 자료원: 통계청 사망원인통계 (1983-2018)  
 · 대상자: 전 연령 주민등록인구 (일부 신원미상자 포함)  
 · 분석 내용: 연도 및 성별 전체순환기질환에 의한 보통사망률과 연령표준화 사망률을 계산함  
 · 사인 코드: 전체순환기질환 (I00-199)  
 · 연령표준화: 2018년도 남/녀 각 주민등록인구 기준 직접표준화



## 전체순환기질환 사망률 변화 (연령구간별)

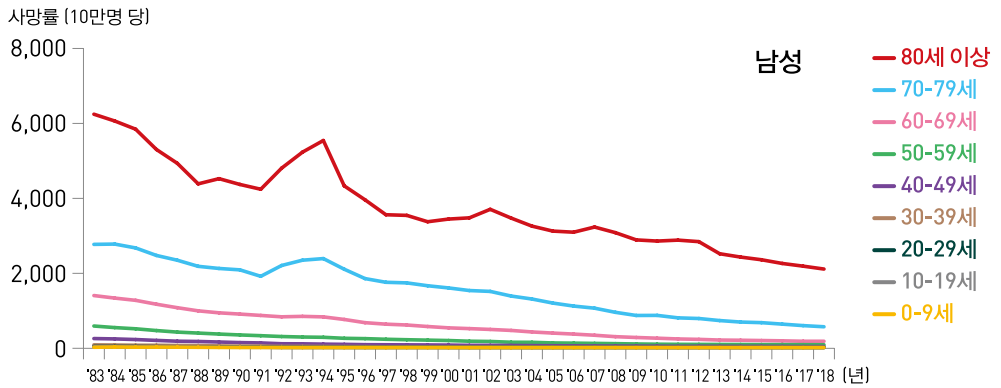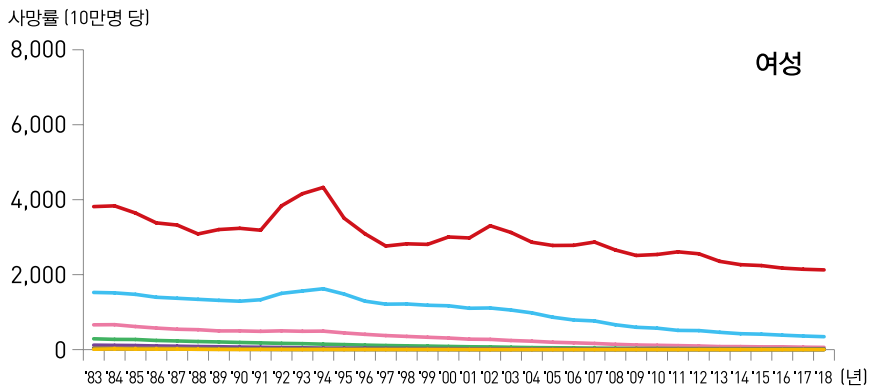

- 모든 연령에서 전체순환기질환 사망률이 꾸준히 감소하는 추세를 보이며, 특히 50세 이상에서 빠르게 감소하고 있음

· 자료원: 통계청 사망원인통계 (1983-2018)  
 · 대상자: 전 연령 주민등록인구 (일부 신원미상자 포함)  
 · 분석 내용: 연도 및 성·연령별 전체순환기질환에 의한 사망률을 계산함  
 · 사인 코드: 전체순환기질환 (I00-199)

## 심장질환 사망률 변화 [전체연령]

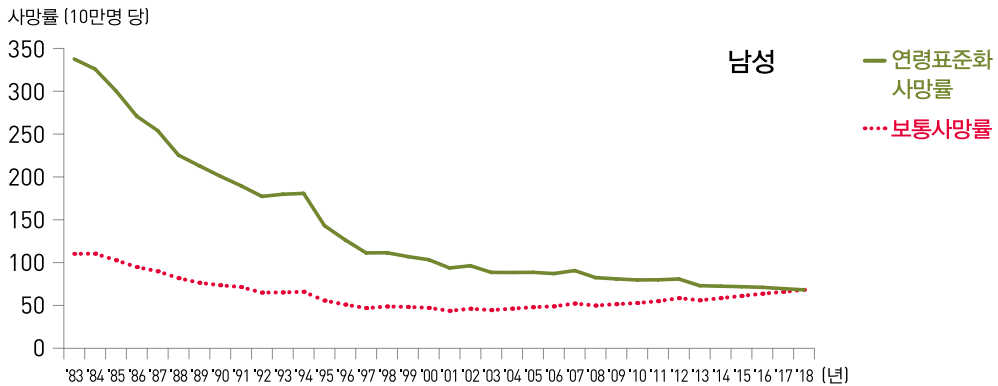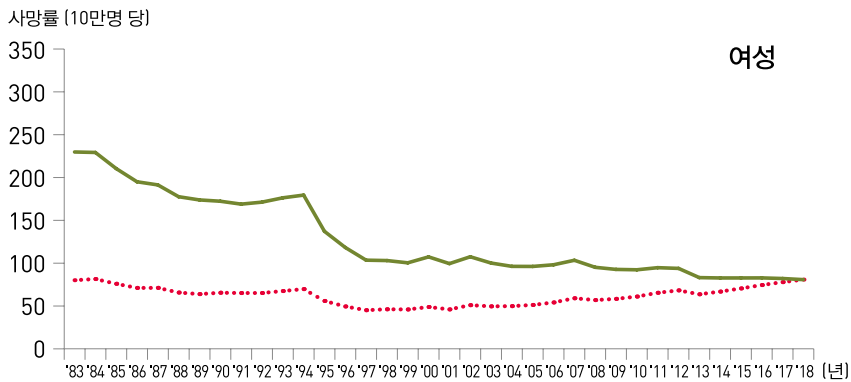

- 남/녀 모두에서 심장질환 연령표준화 사망률은 꾸준히 감소하고 있으나, 보통사망률은 2000년대 이후 증가하는 추세를 보임
- 남성: 1983-2018년 사이 10만명당 연령표준화 사망률은 80% 감소 (338 → 68), 보통사망률은 38% 감소 (110 → 68) 하였음
- 여성: 1983-2018년 사이 10만명당 연령표준화 사망률은 65% 감소 (230 → 81), 보통사망률은 1% 증가 (80 → 81) 하였음

· 자료원: 통계청 사망원인통계 (1983-2018)  
· 대상자: 전 연령 주민등록인구 (일부 신원미상자 포함)  
· 분석 내용: 연도 및 성별 심장질환에 의한 보통사망률과 연령표준화 사망률을 계산함  
· 사인 코드: 심장질환 (I00-I13, I20-I51)  
· 연령표준화: 2018년도 남/녀 각 주민등록인구 기준 직접표준화

## 심장질환 사망률 변화 (연령구간별)

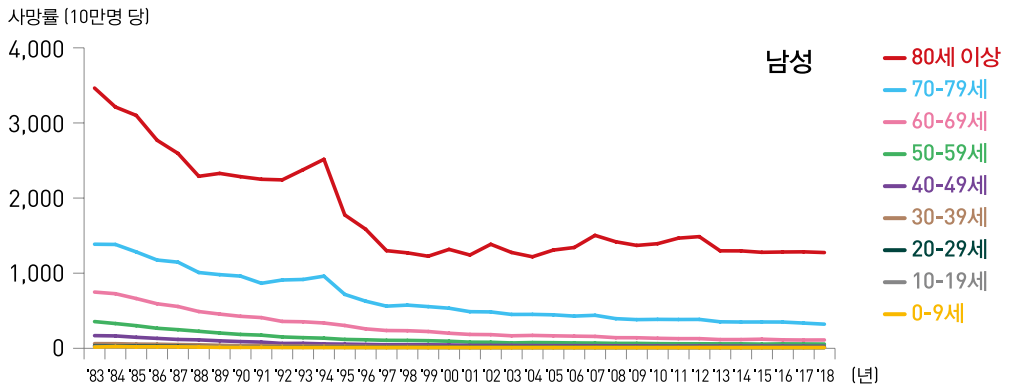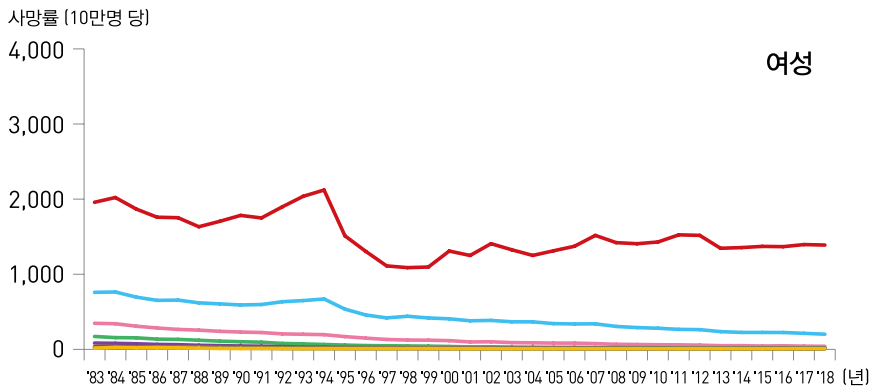

- 남/녀 모두 전 연령층에서 심장질환 사망률이 꾸준히 감소하는 추세를 보이나, 80세 이상 고령층에서는 2000년대 이후 감소 추이가 뚜렷하지 않음

· 자료원: 통계청 사망원인통계 (1983-2018)  
 · 대상자: 전 연령 주민등록인구 (일부 신원미상자 포함)  
 · 분석 내용: 연도 및 성·연령별 심장질환에 의한 사망률을 계산함  
 · 사인 코드: 심장질환 (I00-I13, I20-I51)

## 허혈성심질환 사망률 변화 [전체연령]

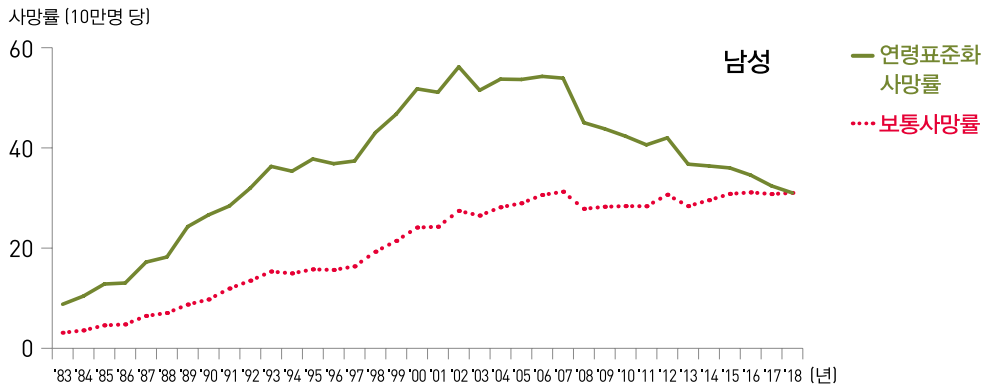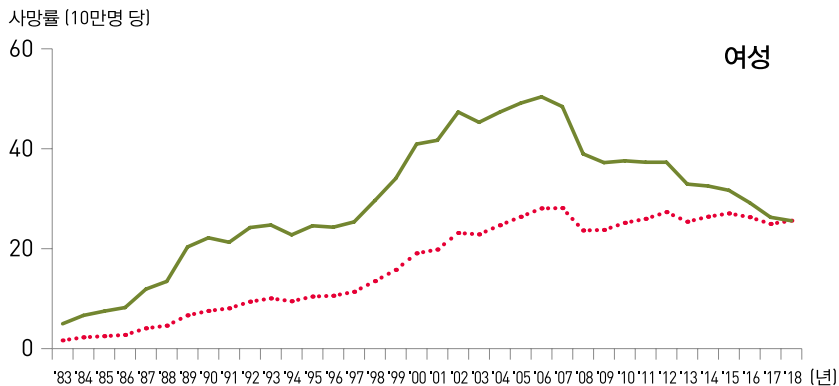

- 남/녀 모두에서 허혈성심질환 보통사망률 및 연령표준화 사망률은 2000년대 중반까지 증가 추세를 보였으나, 그 이후로는 보통사망률은 큰 변화가 없고, 연령표준화 사망률은 감소하는 추세를 보임
- 남성: 1983-2018년 사이 10만명당 연령표준화 사망률은 257% 증가 (8.7 → 30.9), 보통사망률은 949% 증가 (3.0 → 30.9) 하였음
- 여성: 1983-2018년 사이 10만명당 연령표준화 사망률은 414% 증가 (5.0 → 25.6), 보통사망률은 1453% 증가 (1.6 → 25.6) 하였음

· 자료원: 통계청 사망원인통계 (1983-2018)  
 · 대상자: 전 연령 주민등록인구 (일부 신원미상자 포함)  
 · 분석 내용: 연도 및 성별 허혈성심질환에 의한 보통사망률과 연령표준화 사망률을 계산함  
 · 사인 코드: 허혈성심질환 (I20-I25)  
 · 연령표준화: 2018년도 남/녀 각 주민등록인구 기준 직접표준화

## 허혈성심질환 사망률 변화 (연령구간별)

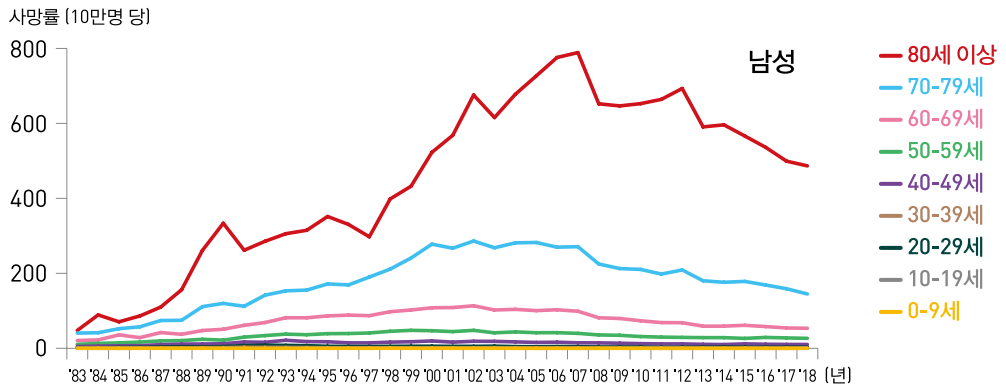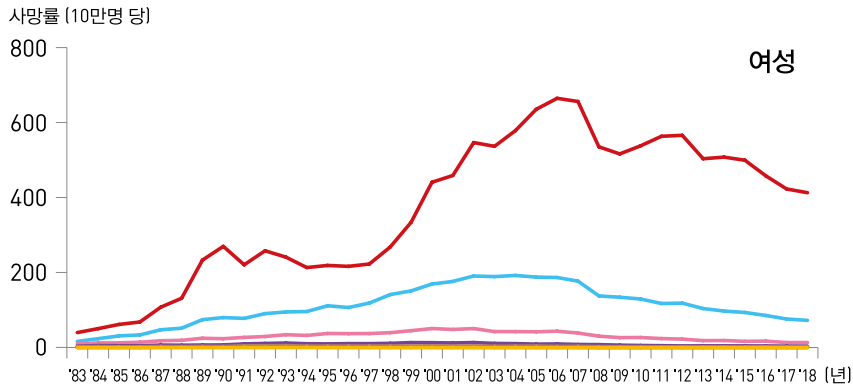

- 남/녀 모두 60세 이상에서 허혈성심질환 사망률이 2000년대 중반까지 증가 추세를 보였으나, 그 이후로는 감소 추세를 보임

· 자료원: 통계청 사망원인통계 (1983-2018)  
 · 대상자: 전 연령 주민등록인구 (일부 신원미상자 포함)  
 · 분석 내용: 연도 및 성·연령별 허혈성심질환에 의한 사망률을 계산함  
 · 사인 코드: 허혈성심질환 (I20-I25)

## 심근경색증 사망률 변화 [전체연령]

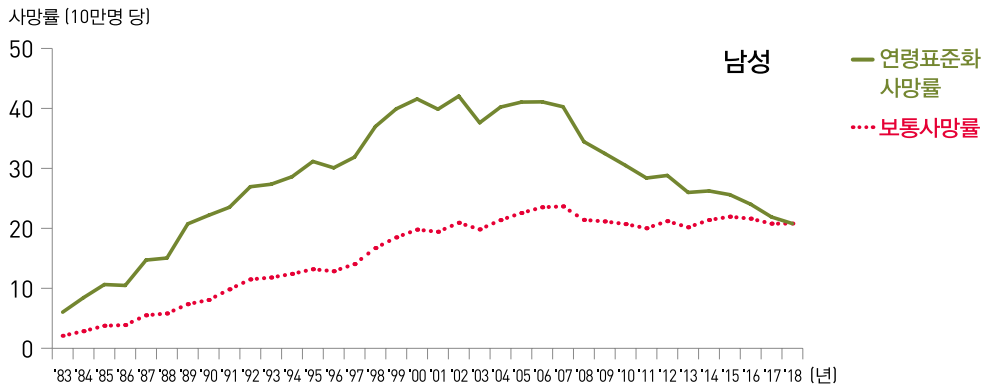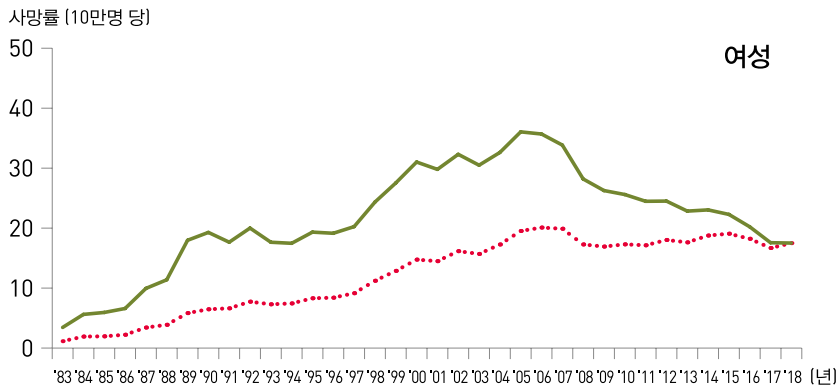

- 남/녀 모두에서 심근경색증 보통사망률 및 연령표준화 사망률은 2000년대 중반까지 증가 추세를 보였으나, 그 이후로는 보통사망률은 큰 변화가 없고, 연령표준화 사망률은 감소하는 추세를 보임
- 남성: 1983-2018년 사이 10만명당 연령표준화 사망률은 245% 증가 (6.0 → 20.8), 보통사망률은 899% 증가 (2.1 → 20.8) 하였음
- 여성: 1983-2018년 사이 10만명당 연령표준화 사망률은 409% 증가 (3.4 → 17.5), 보통사망률은 1426% 증가 (1.1 → 17.5) 하였음

· 자료원: 통계청 사망원인통계 (1983-2018)  
 · 대상자: 전 연령 주민등록인구 (일부 신원미상자 포함)  
 · 분석 내용: 연도 및 성별 심근경색증에 의한 보통사망률과 연령표준화 사망률을 계산함  
 · 사인 코드: 심근경색증 (I21-I23)  
 · 연령표준화: 2018년도 남/녀 각 주민등록인구 기준 직접표준화

## 심근경색증 사망률 변화 (연령구간별)

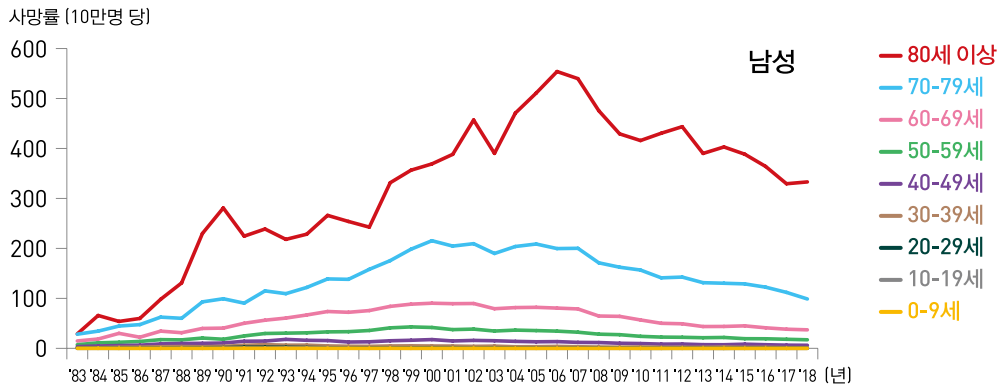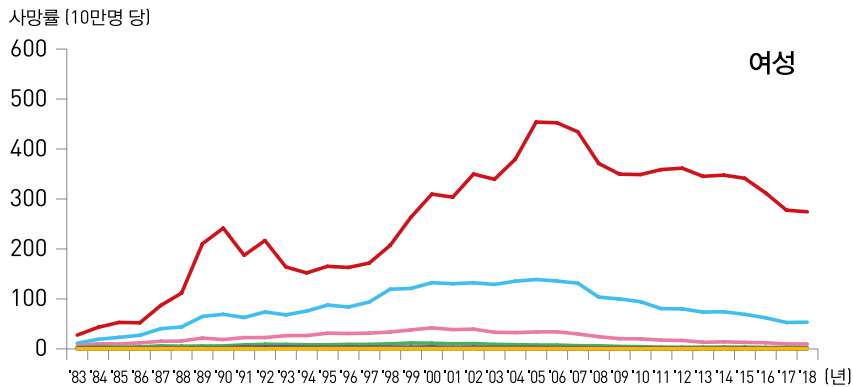

- 남/녀 모두 60세 이상에서 심근경색증 사망률이 2000년대 중반까지 증가 추세를 보였으나, 그 이후로는 감소 추세를 보임

· 자료원: 통계청 사망원인통계 (1983-2018)  
 · 대상자: 전 연령 주민등록인구 (일부 신원미상자 포함)  
 · 분석 내용: 연도 및 성·연령별 심근경색증에 의한 사망률을 계산함  
 · 사인 코드: 심근경색증 (I21-I23)

## 심부전 사망률 변화 (전체연령)

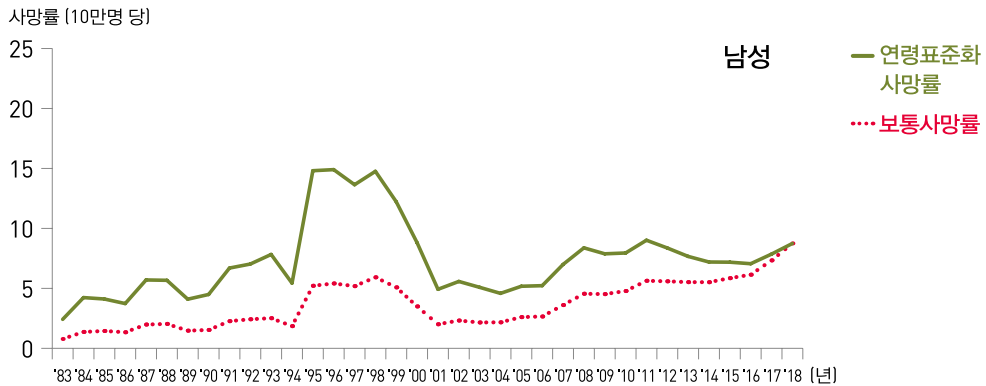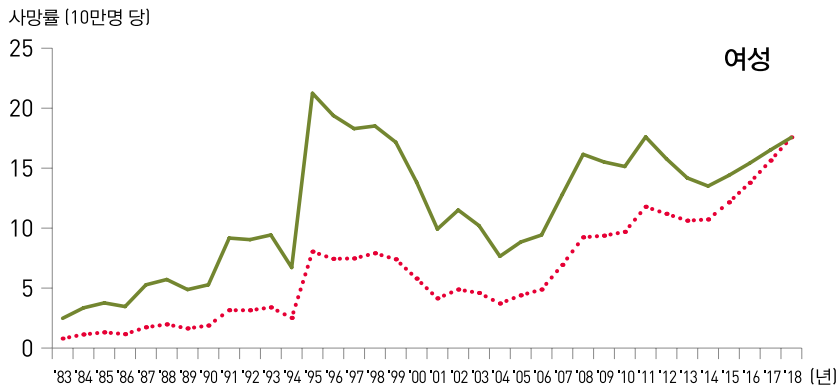

- 남/녀 모두에서 심부전 보통사망률 및 연령표준화 사망률이 꾸준히 증가하는 추세이나, 1994-2001년 사이에는 일시적으로 크게 증가하였다가 감소하였음
- 남성: 1983-2018년 사이 10만명당 연령표준화 사망률은 262% 증가 (2.4 → 8.7), 보통사망률은 1123% 증가 (0.7 → 8.7) 하였음
- 여성: 1983-2018년 사이 10만명당 연령표준화 사망률은 608% 증가 (2.5 → 17.6), 보통사망률은 2114% 증가 (0.8 → 17.6) 하였음

· 자료원: 통계청 사망원인통계 (1983-2018)  
· 대상자: 전 연령 주민등록인구 (일부 신원미상자 포함)  
· 분석 내용: 연도 및 성별 심부전에 의한 보통사망률과 연령표준화 사망률을 계산함  
· 사인 코드: 심부전 (I50)  
· 연령표준화: 2018년도 남/녀 각 주민등록인구 기준 직접표준화



## 심부전 사망률 변화 (연령구간별)

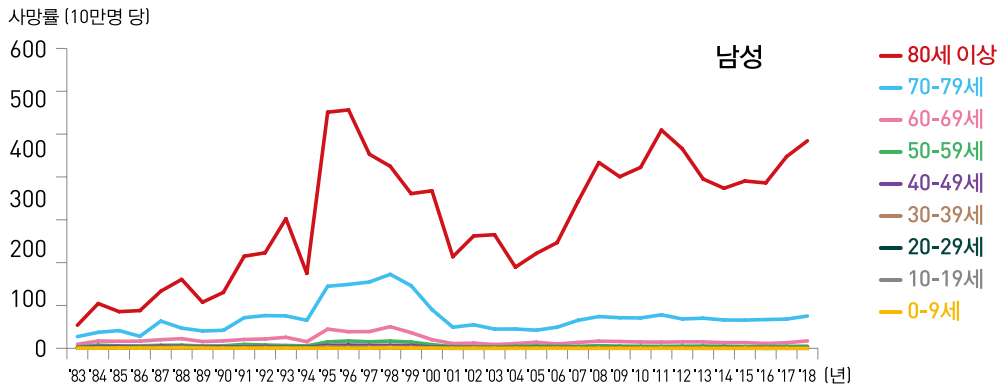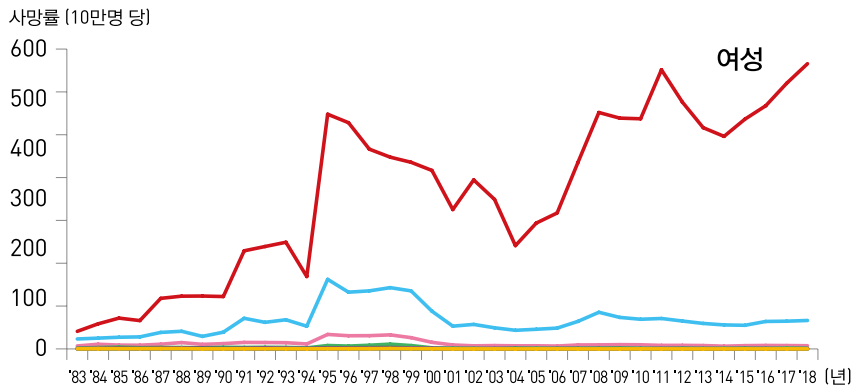

- 남/녀 모두 80세 이상에서 심부전 사망률이 꾸준히 증가하는 추세를 보이며, 이는 여성에서 더욱 두드러지게 나타남

· 자료원: 통계청 사망원인통계 (1983-2018)  
 · 대상자: 전 연령 주민등록인구 (일부 신원미상자 포함)  
 · 분석 내용: 연도 및 성·연령별 심부전에 의한 사망률을 계산함  
 · 사인 코드: 심부전 (I50)

## 고혈압 사망률 변화 (전체연령)

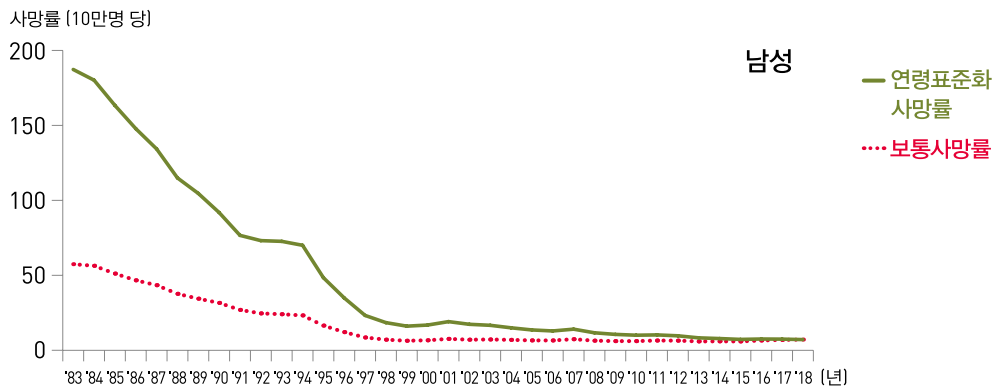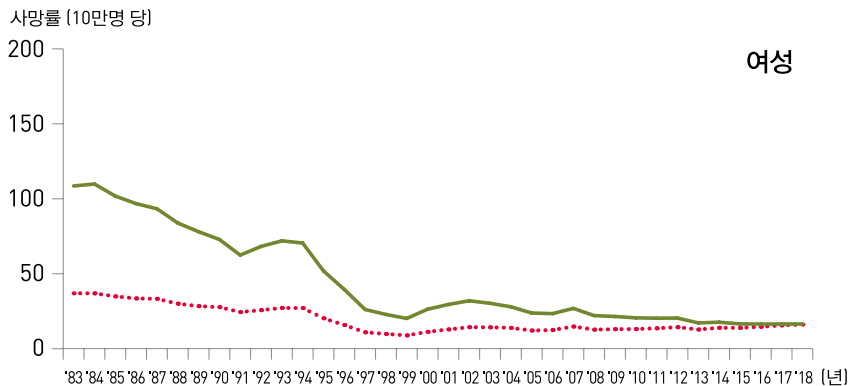

- 남/녀 모두에서 고혈압 보통사망률 및 연령표준화 사망률이 2000년도 전후까지 꾸준히 감소하는 추세를 보였으나, 그 이후로는 감소세가 완화된 모습을 보임
- 남성: 1983-2018년 사이 10만명당 연령표준화 사망률은 96% 감소 (187 → 7), 보통사망률은 88% 감소 (57 → 7) 하였음
- 여성: 1983-2018년 사이 10만명당 연령표준화 사망률은 85% 감소 (109 → 17), 보통사망률은 55% 감소 (37 → 17) 하였음

· 자료원: 통계청 사망원인통계 (1983-2018)  
· 대상자: 전 연령 주민등록인구 (일부 신원미상자 포함)  
· 분석 내용: 연도 및 성별 고혈압에 의한 보통사망률과 연령표준화 사망률을 계산함  
· 사인 코드: 고혈압 (I10-I13)  
· 연령표준화: 2018년도 남/녀 각 주민등록인구 기준 직접표준화

## 고혈압 사망률 변화 (연령구간별)

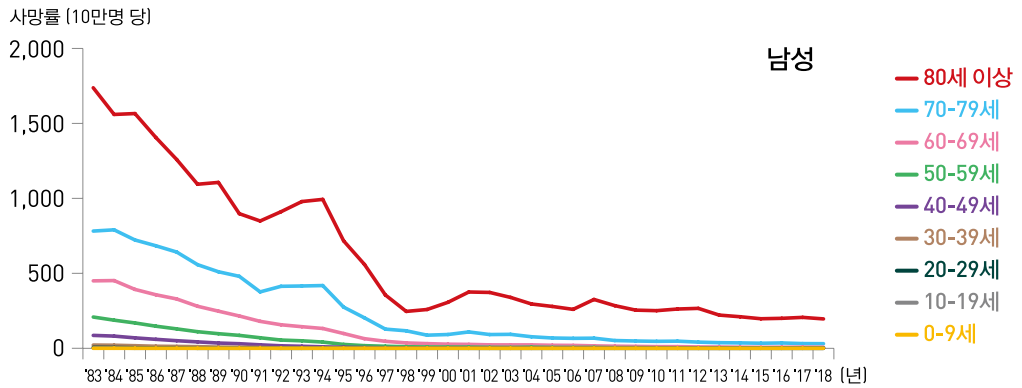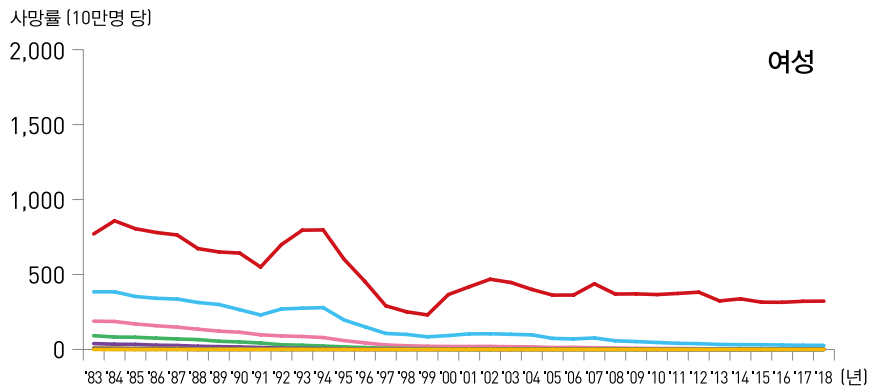

- 남/녀 모두 60세 이상에서 고혈압 사망률이 2000년도 전후까지 꾸준히 감소하는 추세를 보였으나, 그 이후로는 감소세가 완화된 모습을 보임

· 자료원: 통계청 사망원인통계 (1983-2018)  
· 대상자: 전 연령 주민등록인구 (일부 신원미상자 포함)  
· 분석 내용: 연도 및 성·연령별 고혈압에 의한 사망률을 계산함  
· 사인 코드: 고혈압 (I10-I13)

## 뇌혈관질환 사망률 변화 (전체연령)

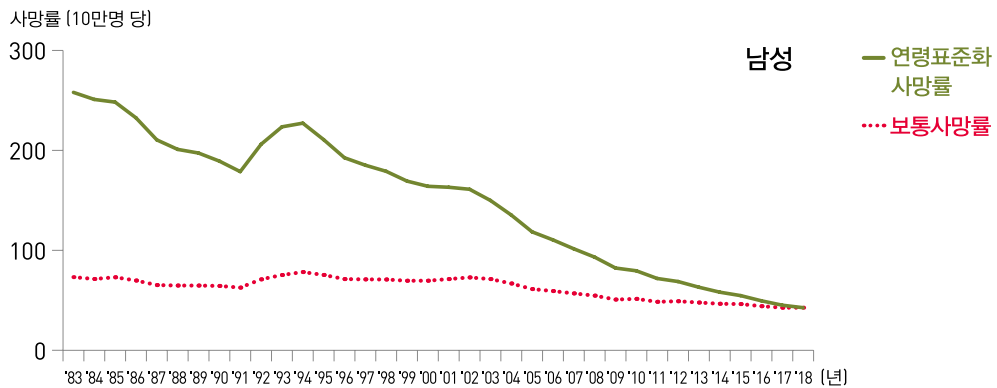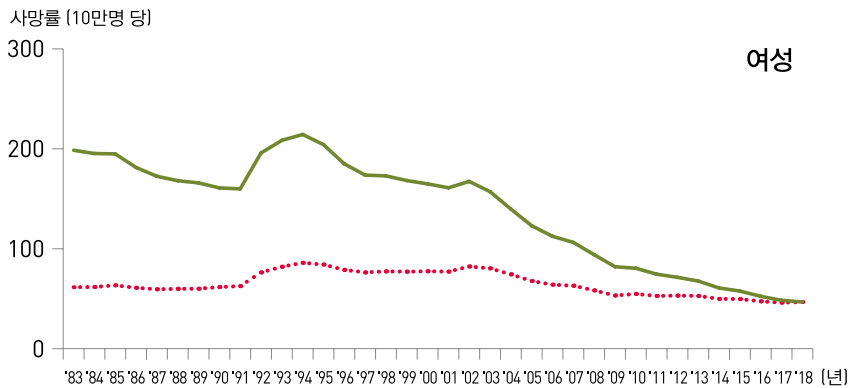

- 성별과 관계 없이 뇌혈관질환 보통사망률 및 연령표준화 사망률은 모두 감소 추세이며, 감소 속도는 연령표준화 사망률에서 더 크게 나타남
- 남성: 1983-2018년 사이 10만명당 연령표준화 사망률은 84% 감소 (258 → 43), 보통사망률은 42% 감소 (73 → 43) 하였음
- 여성: 1983-2018년 사이 10만명당 연령표준화 사망률은 77% 감소 (199 → 47), 보통사망률은 24% 감소 (62 → 47) 하였음

· 자료원: 통계청 사망원인통계 (1983-2018)  
· 대상자: 전 연령 주민등록인구 (일부 신원미상자 포함)  
· 분석 내용: 연도 및 성별 뇌혈관질환에 의한 보통사망률과 연령표준화 사망률을 계산함  
· 사인 코드: 뇌혈관질환 (I60-169)  
· 연령표준화: 2018년도 남/녀 각 주민등록인구 기준 직접표준화

## 뇌혈관질환 사망률 변화 (연령구간별)

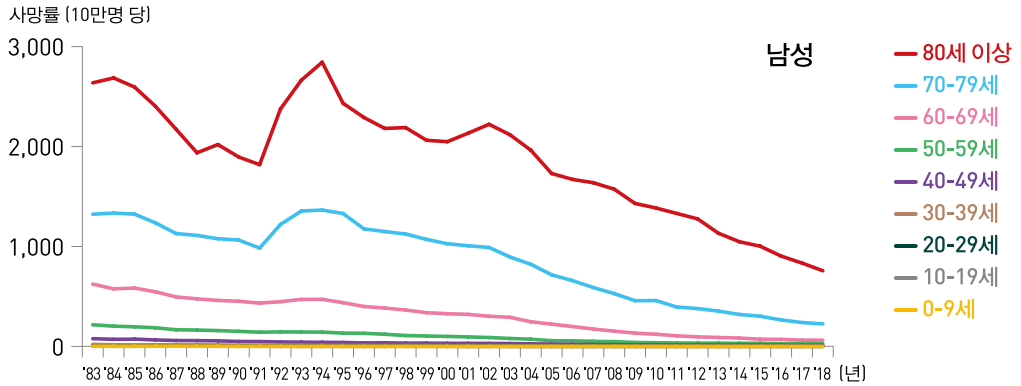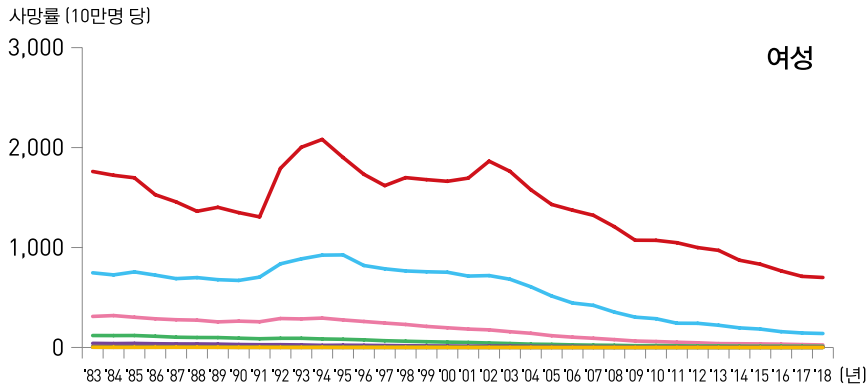

- 남/녀 모두 전 연령에서 뇌혈관질환 사망률이 감소 추세를 보이며, 특히 50세 이상에서 빠르게 감소하고 있음

· 자료원: 통계청 사망원인통계 (1983-2018)  
 · 대상자: 전 연령 주민등록인구 (일부 신원미상자 포함)  
 · 분석 내용: 연도 및 성·연령별 뇌혈관질환에 의한 사망률을 계산함  
 · 사인 코드: 뇌혈관질환 (I60-I69)

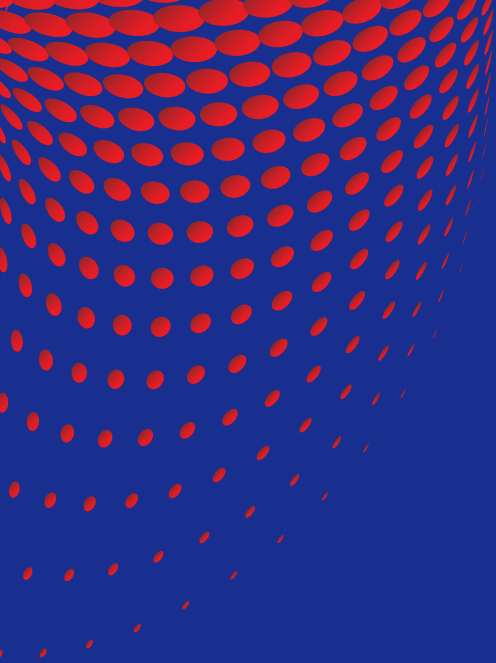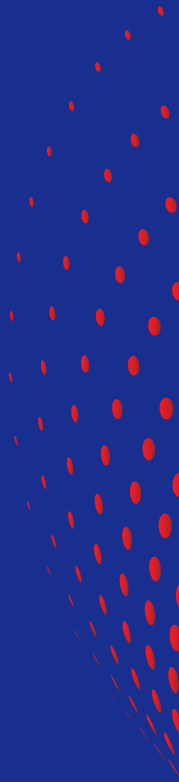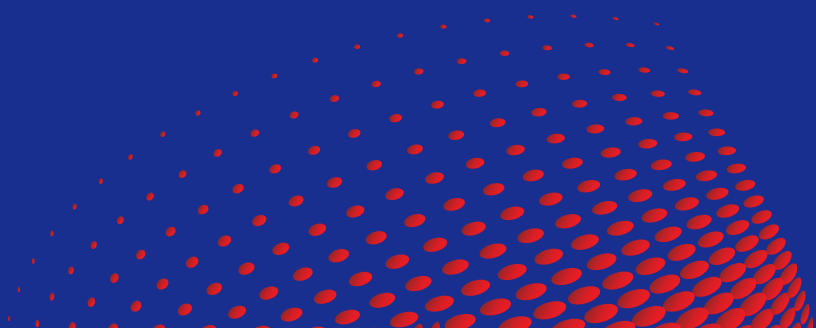

HEART DISEASE  
FACT SHEET 2020

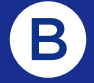

# 순환기질환으로 인한 입원 현황



## 전체순환기질환, 심장질환 및 뇌혈관질환 입원환자 수 변화

〈주상병 기준〉

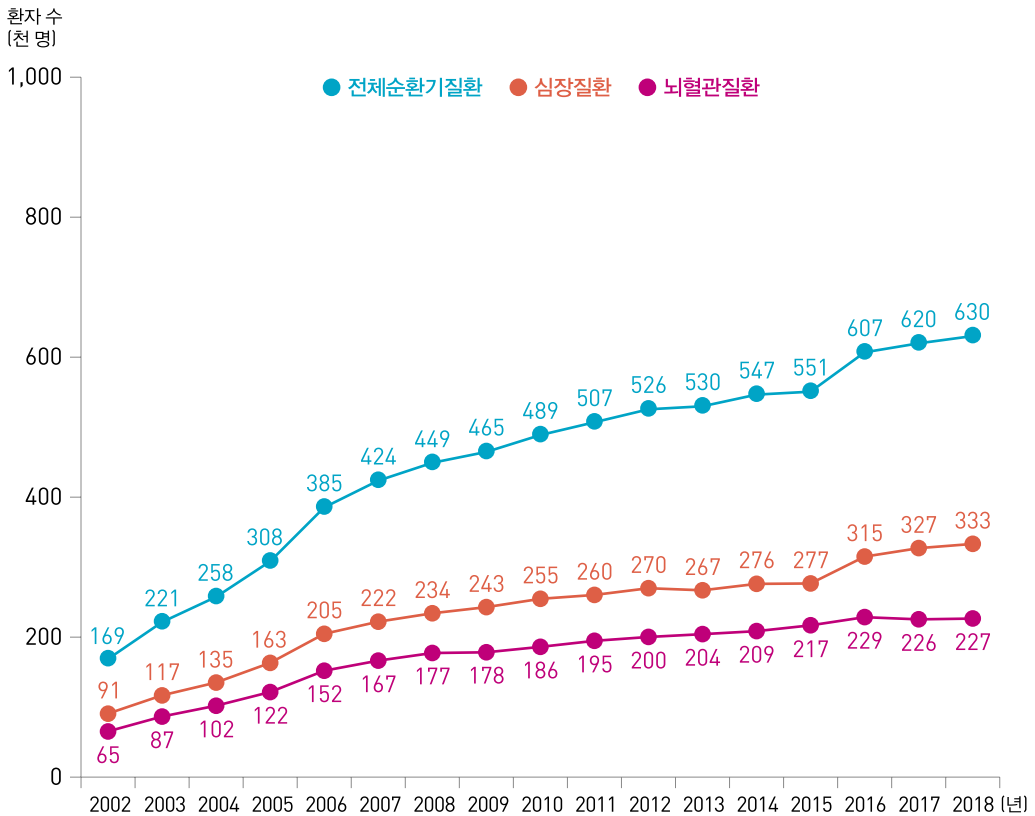

- 주상병명을 기준으로 하면, 2002-2018년 사이 입원환자 수는 전체순환기질환은 3.7배, 심장질환은 3.7배, 뇌혈관질환은 3.5배로 증가하였음



## 전체순환기질환, 심장질환 및 뇌혈관질환 입원환자 수 변화

〈전체상병 기준〉

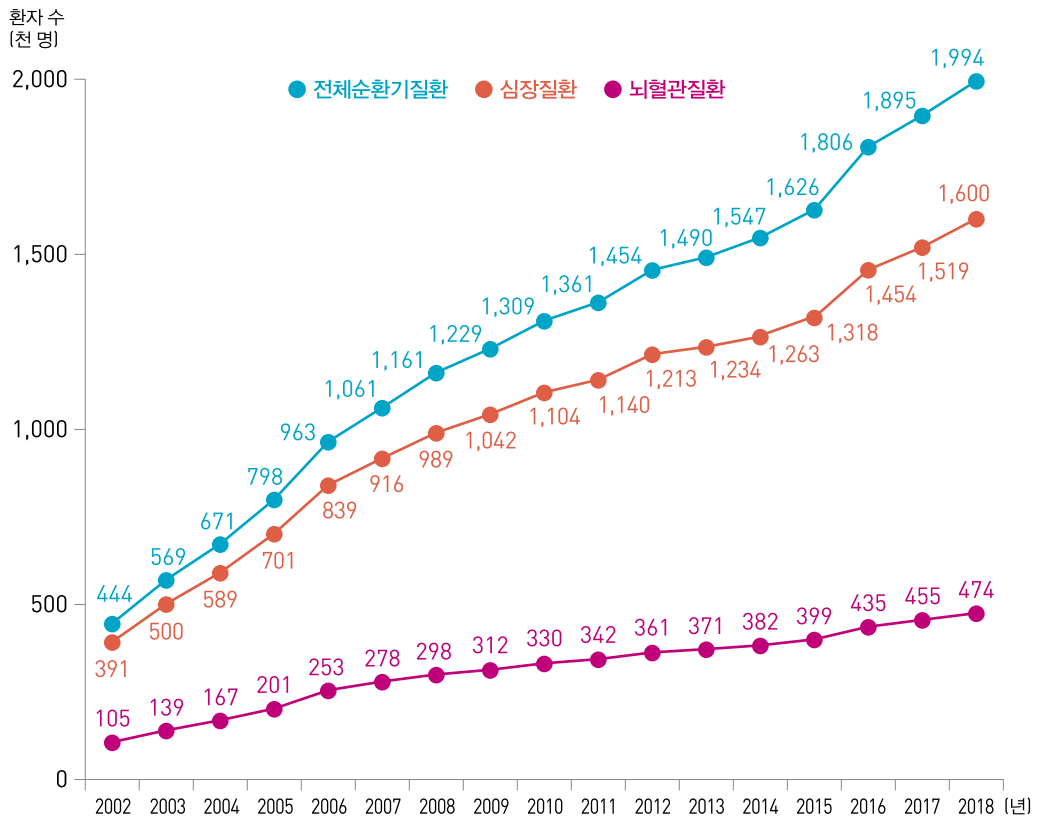

- 전체상병명을 기준으로 하면, 2002-2018년 사이 입원환자 수는 전체순환기질환은 4.5배, 심장질환은 4.1배, 뇌혈관질환은 4.5배로 증가하였음

· 자료원: 국민건강보험 빅데이터 (2002-2018)

· 대상자: 20세 이상 건강보험가입자 및 의료급여수급권자

· 분석 내용: 연도별 전체순환기질환, 심장질환 및 뇌혈관질환으로 인한 입원환자 수를 계산함 (주상병: 해당 질환이 주진단인 입원 / 전체상병: 해당 질환이 주진단 또는 기타진단인 입원)

· 상병 코드: 전체순환기질환 (I00-I99), 심장질환 (I00-I13, I20-I51), 뇌혈관질환 (I60-I69)

## 전체순환기질환 및 주요 심혈관질환 입원율 변화

〈주상병 기준〉

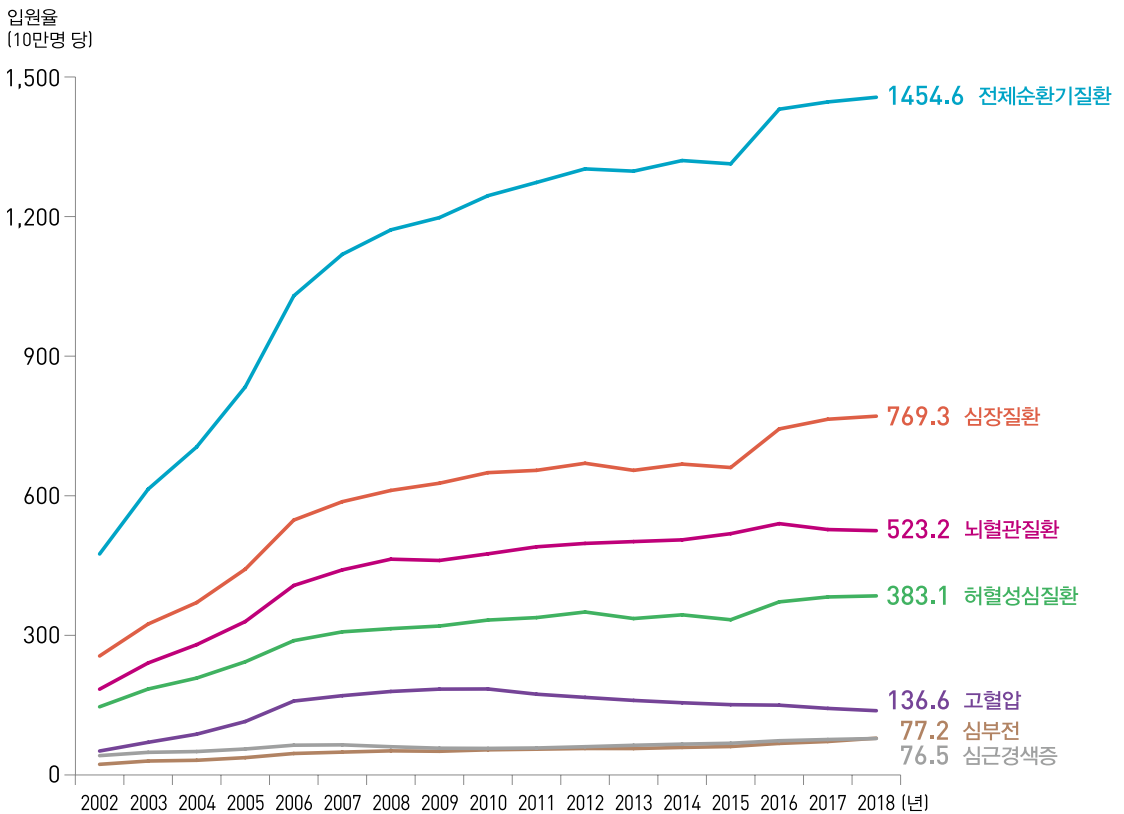

- 주상병명을 기준으로 하면, 2002-2018년 사이 10만명당 입원율은 전체순환기질환은 3.1배 증가 (474 → 1455), 심장질환은 3.0배 증가 (255 → 769), 허혈성심질환은 2.6배 증가 (146 → 383), 심근경색증은 1.9배 증가 (41 → 77), 심부전은 3.5배 증가 (22 → 77), 고혈압은 2.7배 증가 (50 → 137), 뇌혈관질환은 2.9배 증가 (183 → 523) 하였음

## 전체순환기질환 및 주요 심혈관질환 입원율 변화

〈전체상병 기준〉

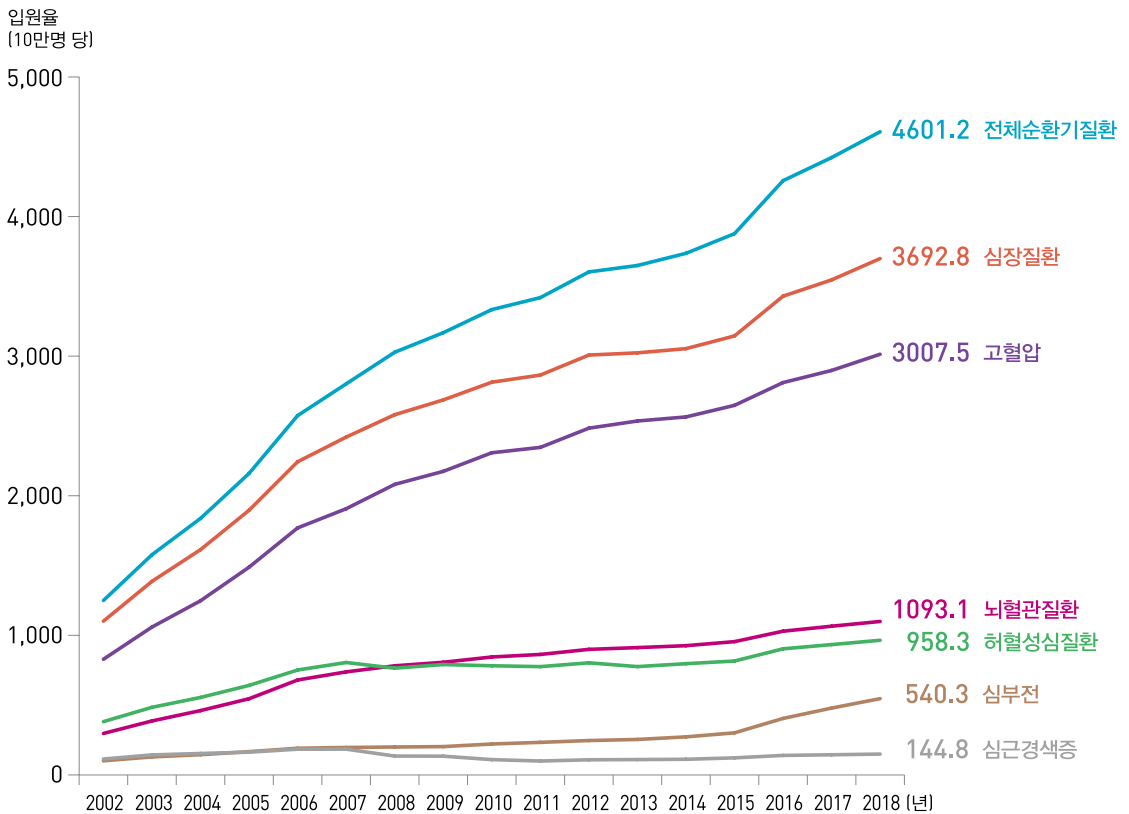

- 전체상병명을 기준으로 하면, 2002-2018년 사이 10만명당 입원율은 전체순환기질환은 3.7배 증가 (1247 → 4601), 심장질환은 3.4배 증가 (1099 → 3693), 허혈성심질환은 2.5배 증가 (379 → 958), 심근경색증은 1.3배 증가 (111 → 145), 심부전은 5.5배 증가 (99 → 540), 고혈압은 3.6배 증가 (826 → 3007), 뇌혈관질환은 3.7배 증가 (295 → 1093) 하였음

· 자료원: 국민건강보험 빅데이터 (2002-2018)

· 대상자: 20세 이상 건강보험가입자 및 의료급여수급권자

· 분석 내용: 연도별 전체순환기질환 및 주요 심혈관질환으로 인한 입원율을 개산함 (주상병: 해당 질환이 주진단인 입원 / 전체상병: 해당 질환이 주진단 또는 기타진단인 입원)

· 상병 코드: 전체순환기질환 (I00-I99), 심장질환 (I00-I13, I20-I51), 허혈성심질환 (I20-I25), 심근경색증 (I21-I23), 심부전 (I50), 고혈압 (I10-I13), 뇌혈관질환 (I60-I69)

## 전체순환기질환 및 주요 심혈관질환 연령표준화 입원율 변화

〈주상병 기준〉

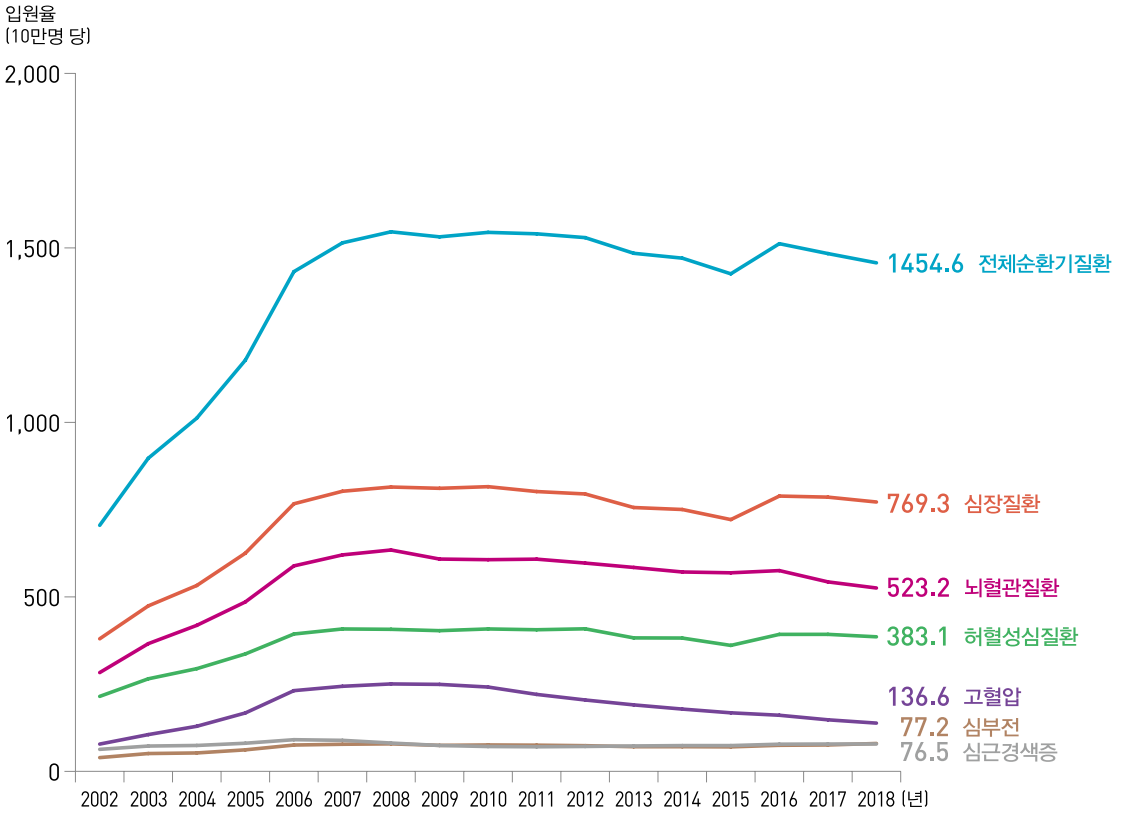

- 주상병명을 기준으로 하면, 2002-2018년 사이 10만명당 연령표준화 입원율은 전체순환기질환은 2.1배 증가 (704 → 1455), 심장질환은 2.0배 증가 (379 → 769), 허혈성심질환은 1.8배 증가 (214 → 383), 심근경색증은 1.2배 증가 (62 → 77), 심부전은 2.0배 증가 (38 → 77), 고혈압은 1.8배 증가 (77 → 137), 뇌혈관질환은 1.9배 증가 (282 → 523) 하였음

## 전체순환기질환 및 주요 심혈관질환 연령표준화 입원율 변화 (전체상병 기준)

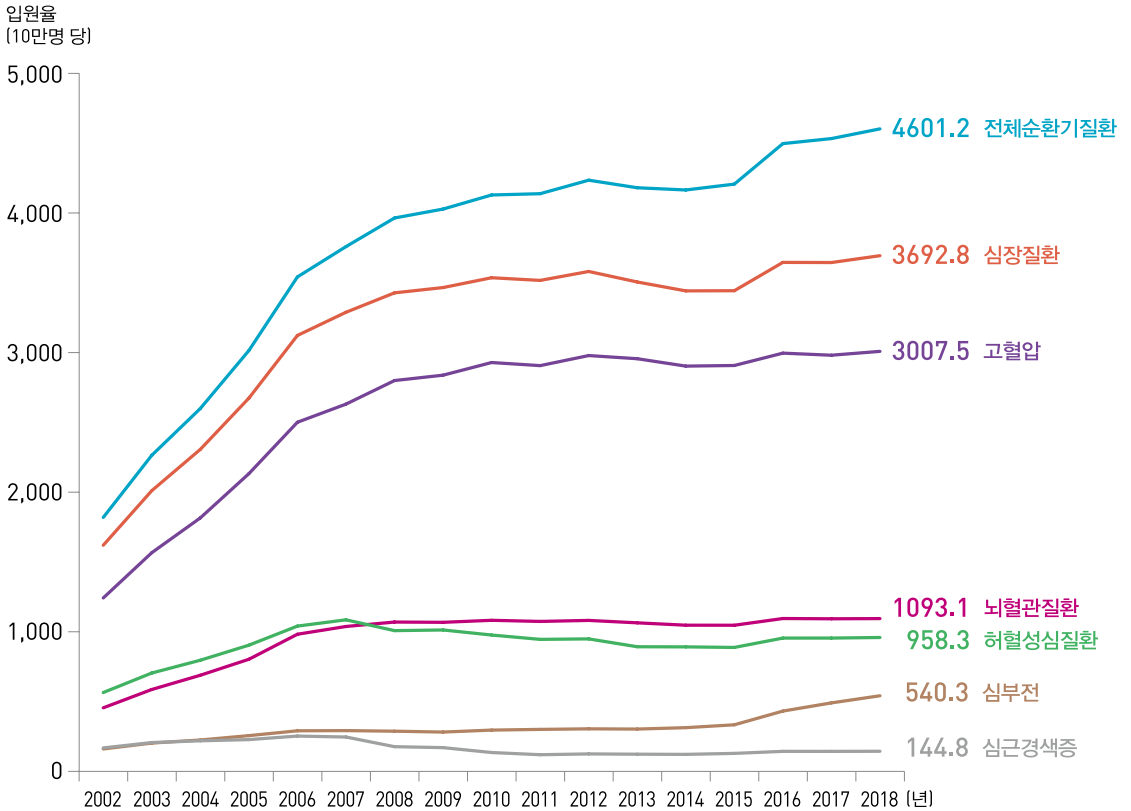

- 전체상병명을 기준으로 하면, 2002-2018년 사이 10만명당 연령표준화 입원율은 전체순환기질환은 2.5배 증가 (1820 → 4601), 심장질환은 2.3배 증가 (1621 → 3693), 허혈성심질환은 1.7배 증가 (566 → 958), 심부전은 3.3배 증가 (162 → 540), 고혈압은 2.4배 증가 (1243 → 3007), 뇌혈관질환은 2.4배 증가 (456 → 1093) 하였으나, 심근경색증은 0.9배로 감소 (168 → 145) 하였음

· 자료원: 국민건강보험 빅데이터 (2002-2018)

· 대상자: 20세 이상 건강보험가입자 및 의료급여수급권자

· 분석 내용: 연도별 전체순환기질환 및 주요 심혈관질환으로 인한 연령표준화 입원율을 계산함 (주상병: 해당 질환이 주진단인 입원 / 전체상병: 해당 질환이 주진단인 또는 기타진단인 입원)

· 상병 코드: 전체순환기질환 (I00-I99), 심장질환 (I00-I13, I20-I51), 허혈성심질환 (I20-I25), 심근경색증 (I21-I23), 심부전 (I50), 고혈압 (I10-I13), 뇌혈관질환 (I60-I69)

· 연령표준화: 2018년도 건강보험 대상 인구 기준 직접표준화

HEART DISEASE  
FACT SHEET 2020

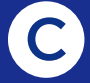

주요 순환기질환  
위험요인 유병 현황

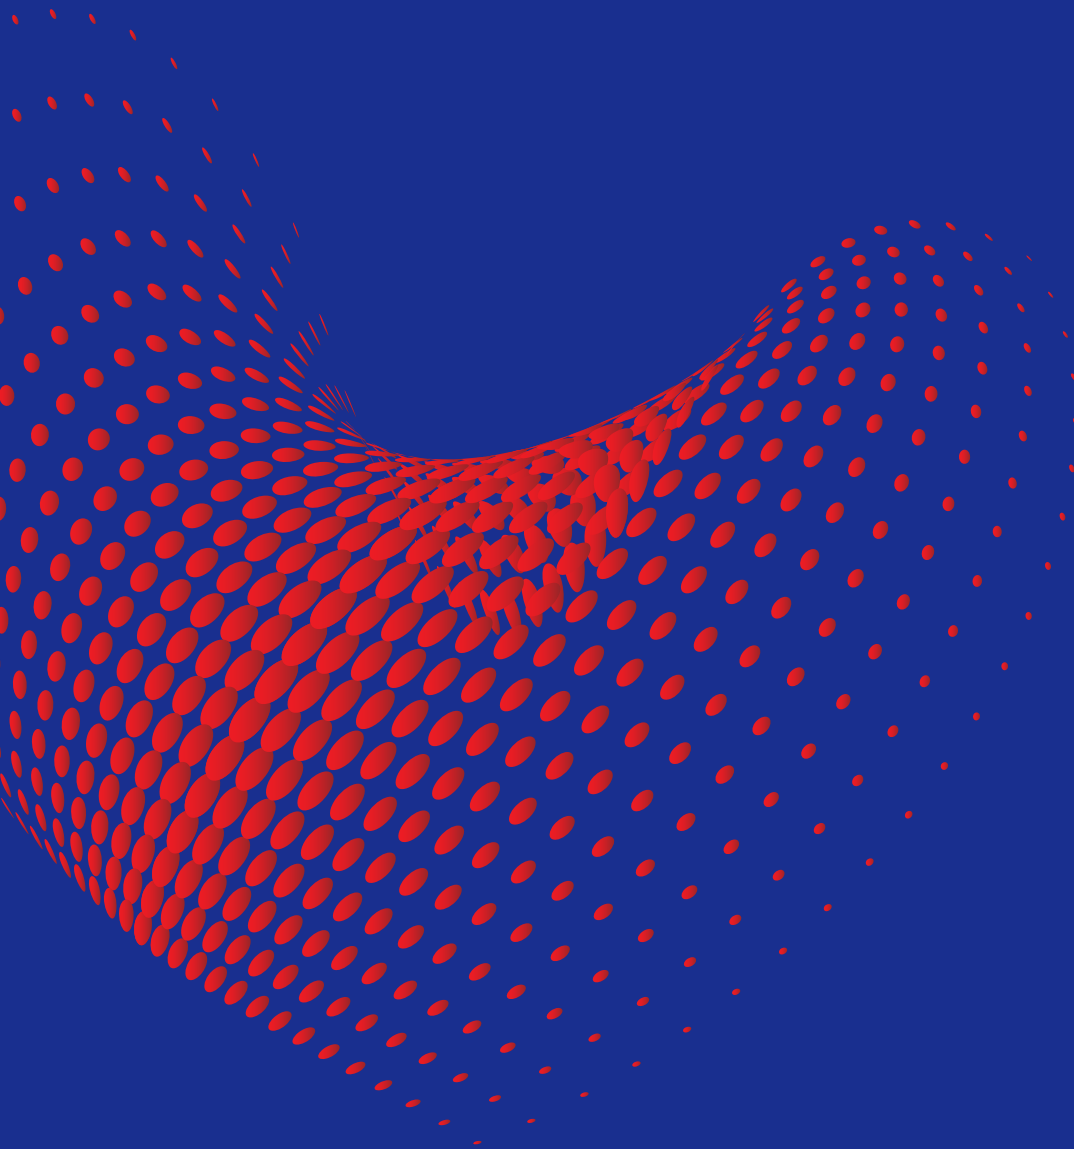

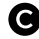

주요 순환기질환 위험요인 유병 현황

# 주요 순환기질환 위험요인 유병자 수 현황 (2018년)

(단위: 천명)

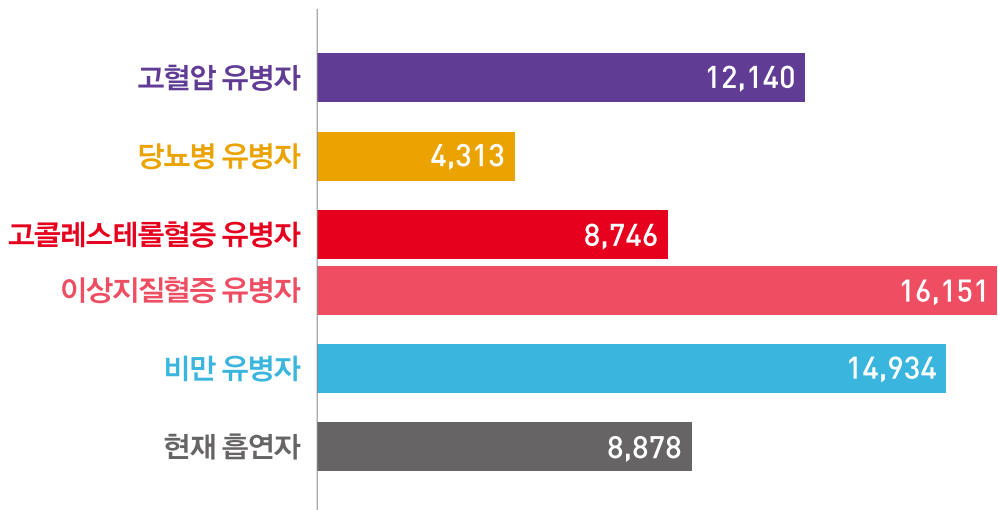

- 자료원: 국민건강영양조사 [2018]
- 대상자: 20세 이상 국민건강영양조사 원료자
- 분석 내용: 국민건강영양조사 내 유병률을 토대로 위험요인 별 전체 유병자의 수를 추산함
- 위험요인 정의:
  - 고혈압: ① 수축기혈압이 140 mmHg 이상이거나, ② 이완기혈압이 90 mmHg 이상이거나, ③ 고혈압 약물을 복용하는 경우
  - 당뇨병: ① 공복혈당이 126 mg/dL 이상이거나, ② 경구용 혈당강하제 복용 또는 인슐린 치료중인 경우
  - 고콜레스테롤혈증: ① 총콜레스테롤이 240 mg/dL 이상이거나, ② 콜레스테롤 강하제를 복용하는 경우
  - 이상지질혈증: ① LDL 콜레스테롤이 160 mg/dL 이상이거나, ② 중성지방이 200 mg/dL 이상이거나, ③ HDL 콜레스테롤이 40 mg/dL 미만이거나, ④ 콜레스테롤 강하제를 복용하는 경우
  - 비만: 체질량지수가 25 kg/m<sup>2</sup> 이상인 경우
  - 현재 흡연: 평생 담배를 5갑(100개비) 이상 피웠고, 현재 흡연 중인 경우

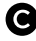

## 성·연령별 주요 순환기질환 위험요인 개수 (2018년)

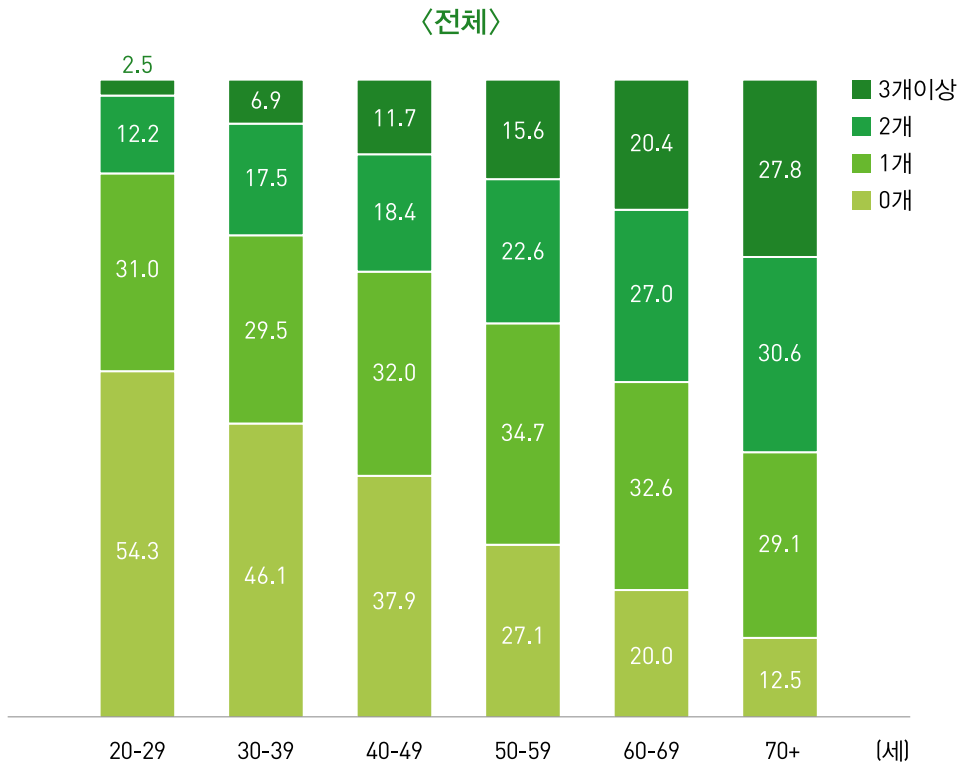

- 연령이 증가할수록 순환기질환 위험요인의 개수가 빠르게 증가하여 70세 이상 인구의 58%가 2개 이상, 28%가 3개 이상의 위험요인을 가짐



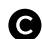

## 성·연령별 주요 순환기질환 위험요인 개수 (2018년)

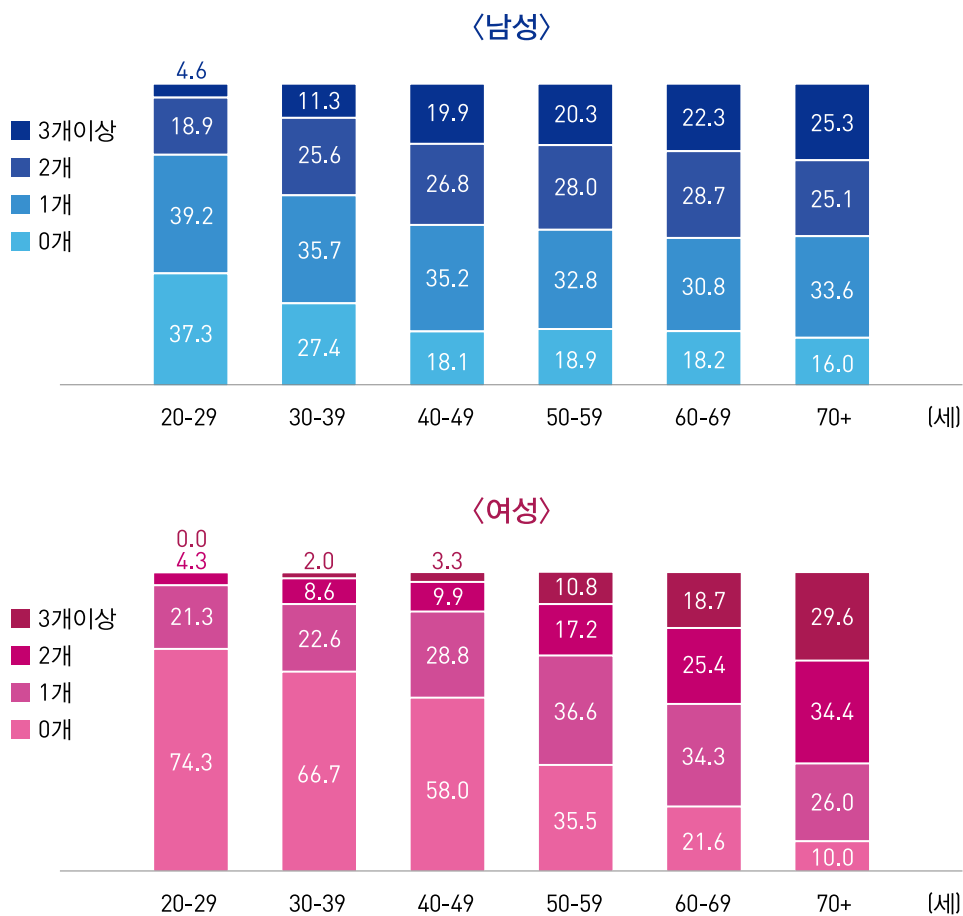

· 자료원: 국민건강영양조사 [2018]  
 · 대상자: 20세 이상 국민건강영양조사 완료자  
 · 분석 내용: 국민건강영양조사 결과를 토대로 성·연령별 주요 순환기질환 위험요인 개수의 분포를 추산함  
 · 위험요인 종류: ① 고혈압, ② 당뇨병, ③ 고콜레스테롤혈증, ④ 비만, ⑤ 현재 흡연

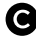

## 고혈압 유병률 변화

| 연도   | 유병률, % (95% 신뢰구간) |                  |                  |
|------|-------------------|------------------|------------------|
|      | 전체                | 남성               | 여성               |
| 1998 | 25.1 (23.7-26.5)  | 28.5 (26.6-30.4) | 22.1 (20.4-23.7) |
| 2001 | 26.0 (24.3-27.7)  | 30.7 (28.4-33.1) | 22.7 (20.7-24.7) |
| 2005 | 22.9 (21.3-24.5)  | 25.5 (23.3-27.7) | 20.4 (18.5-22.2) |
| 2007 | 20.4 (18.3-22.5)  | 21.5 (18.5-24.5) | 19.3 (16.8-21.8) |
| 2008 | 22.7 (21.3-24.1)  | 23.5 (21.6-25.3) | 21.9 (20.2-23.5) |
| 2009 | 23.4 (22.0-24.8)  | 25.9 (24.0-27.8) | 20.9 (19.1-22.6) |
| 2010 | 24.1 (22.4-25.8)  | 25.3 (23.0-27.5) | 23.0 (21.0-24.9) |
| 2011 | 26.5 (24.9-28.1)  | 29.8 (27.7-31.9) | 23.3 (21.4-25.2) |
| 2012 | 26.7 (24.8-28.7)  | 28.4 (25.8-31.0) | 25.1 (22.6-27.6) |
| 2013 | 25.7 (24.0-27.5)  | 28.9 (26.7-31.1) | 22.8 (20.7-24.8) |
| 2014 | 24.3 (22.6-25.9)  | 26.4 (24.1-28.7) | 22.2 (20.2-24.2) |
| 2015 | 27.0 (25.3-28.6)  | 29.5 (27.0-32.0) | 24.5 (22.6-26.5) |
| 2016 | 28.5 (26.9-30.1)  | 31.9 (29.7-34.1) | 25.1 (23.2-27.1) |
| 2017 | 26.9 (25.3-28.6)  | 30.4 (28.4-32.5) | 23.5 (21.3-25.6) |
| 2018 | 28.8 (27.0-30.5)  | 31.5 (29.4-33.7) | 26.0 (23.8-28.2) |

- 1998-2018년 사이 고혈압의 유병률은 남성에서 3.0%, 여성에서 3.9% 증가하였음



## 고혈압 연령표준화 유병률 변화

| 연도   | 연령표준화 유병률, % (95% 신뢰구간) |                  |                  |
|------|-------------------------|------------------|------------------|
|      | 전체                      | 남성               | 여성               |
| 1998 | 26.0 (24.8-27.2)        | 29.6 (27.7-31.5) | 22.3 (20.9-23.6) |
| 2001 | 23.6 (22.2-25.0)        | 28.4 (26.2-30.5) | 20.2 (18.7-21.8) |
| 2005 | 22.7 (21.4-24.0)        | 26.1 (24.2-28.0) | 18.9 (17.5-20.3) |
| 2007 | 19.7 (18.0-21.4)        | 21.7 (19.1-24.3) | 17.3 (15.3-19.2) |
| 2008 | 21.4 (20.3-22.4)        | 23.2 (21.7-24.8) | 19.1 (17.9-20.3) |
| 2009 | 21.4 (20.4-22.5)        | 25.2 (23.5-26.8) | 17.4 (16.2-18.6) |
| 2010 | 21.7 (20.5-22.8)        | 24.1 (22.2-26.0) | 18.8 (17.7-19.9) |
| 2011 | 23.9 (22.7-25.1)        | 28.6 (26.8-30.4) | 18.8 (17.6-20.0) |
| 2012 | 23.8 (22.2-25.3)        | 26.9 (24.6-29.2) | 20.3 (18.6-22.0) |
| 2013 | 22.4 (21.1-23.6)        | 26.9 (25.1-28.8) | 17.7 (16.4-19.0) |
| 2014 | 20.5 (19.2-21.7)        | 24.1 (22.0-26.2) | 16.7 (15.5-17.8) |
| 2015 | 22.5 (21.3-23.8)        | 26.7 (24.5-28.9) | 18.2 (16.9-19.4) |
| 2016 | 23.7 (22.5-24.8)        | 28.6 (26.8-30.5) | 18.4 (17.2-19.6) |
| 2017 | 22.4 (21.1-23.6)        | 27.4 (25.6-29.2) | 16.9 (15.6-18.2) |
| 2018 | 23.5 (22.2-24.8)        | 28.0 (26.1-30.0) | 18.6 (17.2-20.0) |

- 1998-2018년 사이 고혈압의 연령표준화 유병률은 남성에서 1.6%, 여성에서 3.7% 감소하였음

· 자료원: 국민건강영양조사 (1998-2018)  
 · 대상자: 20세 이상 국민건강영양조사 완료자  
 · 분석 내용: 연도 및 성별로 고혈압의 유병률, 연령표준화 유병률 및 이의 95% 신뢰구간을 추정함  
 · 고혈압 정의: ① 수축기혈압이 140 mmHg 이상이거나, ② 이완기혈압이 90 mmHg 이상이거나, ③ 고혈압 약물을 복용하는 경우  
 · 연령표준화: 2005년도 추계인구 기준 직접표준화

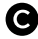

## 당뇨병 유병률 변화

| 연도   | 유병률, % (95% 신뢰구간) |                  |                |
|------|-------------------|------------------|----------------|
|      | 전체                | 남성               | 여성             |
| 2001 | 7.3 (6.4-8.2)     | 8.0 (6.7-9.3)    | 6.8 (5.8-7.8)  |
| 2005 | 6.4 (5.7-7.2)     | 7.0 (5.9-8.1)    | 5.8 (4.8-6.8)  |
| 2007 | 7.2 (5.9-8.5)     | 8.5 (6.6-10.4)   | 6.0 (4.7-7.3)  |
| 2008 | 7.4 (6.7-8.2)     | 8.0 (6.8-9.1)    | 6.9 (6.0-7.9)  |
| 2009 | 7.9 (7.0-8.7)     | 8.7 (7.6-9.9)    | 7.0 (6.0-8.0)  |
| 2010 | 7.8 (7.0-8.7)     | 8.9 (7.6-10.2)   | 6.8 (5.7-7.9)  |
| 2011 | 8.4 (7.4-9.4)     | 10.0 (8.5-11.5)  | 6.8 (5.8-7.8)  |
| 2012 | 7.8 (6.8-8.7)     | 8.3 (7.0-9.6)    | 7.2 (6.0-8.4)  |
| 2013 | 9.4 (8.3-10.4)    | 10.7 (9.1-12.2)  | 8.0 (6.7-9.4)  |
| 2014 | 8.9 (7.9-9.8)     | 10.7 (9.1-12.3)  | 7.1 (6.1-8.1)  |
| 2015 | 8.7 (7.7-9.6)     | 9.7 (8.4-11.0)   | 7.7 (6.4-8.9)  |
| 2016 | 10.5 (9.5-11.6)   | 11.4 (10.0-12.8) | 9.7 (8.4-11.0) |
| 2017 | 10.2 (9.2-11.2)   | 11.6 (10.3-13.0) | 8.7 (7.5-10.0) |
| 2018 | 10.2 (9.3-11.2)   | 11.9 (10.4-13.5) | 8.5 (7.3-9.7)  |

- 2001-2018년 사이 당뇨병의 유병률은 남성에서 3.9%, 여성에서 1.7% 증가하였음

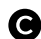

## 당뇨병 연령표준화 유병률 변화

| 연도   | 연령표준화 유병률, % (95% 신뢰구간) |                 |               |
|------|-------------------------|-----------------|---------------|
|      | 전체                      | 남성              | 여성            |
| 2001 | 6.7 (5.9-7.5)           | 7.4 (6.2-8.6)   | 6.2 (5.3-7.1) |
| 2005 | 6.5 (5.7-7.2)           | 7.3 (6.2-8.4)   | 5.5 (4.6-6.5) |
| 2007 | 7.0 (5.8-8.1)           | 8.5 (6.8-10.2)  | 5.4 (4.2-6.6) |
| 2008 | 7.0 (6.3-7.7)           | 7.7 (6.7-8.8)   | 6.1 (5.3-7.0) |
| 2009 | 7.3 (6.6-8.0)           | 8.4 (7.4-9.4)   | 6.1 (5.3-6.9) |
| 2010 | 7.2 (6.5-7.9)           | 8.4 (7.3-9.6)   | 5.9 (5.0-6.9) |
| 2011 | 7.5 (6.7-8.4)           | 9.3 (8.0-10.6)  | 5.7 (4.9-6.6) |
| 2012 | 6.8 (6.1-7.5)           | 7.6 (6.6-8.6)   | 6.1 (5.1-7.1) |
| 2013 | 8.4 (7.5-9.2)           | 10.0 (8.7-11.3) | 6.7 (5.6-7.8) |
| 2014 | 7.8 (7.0-8.6)           | 9.6 (8.2-10.9)  | 6.1 (5.2-6.9) |
| 2015 | 7.4 (6.6-8.2)           | 8.7 (7.4-9.9)   | 6.2 (5.2-7.2) |
| 2016 | 8.7 (7.9-9.5)           | 9.9 (8.7-11.2)  | 7.4 (6.4-8.3) |
| 2017 | 8.3 (7.5-9.0)           | 10.0 (8.8-11.1) | 6.5 (5.6-7.3) |
| 2018 | 8.1 (7.4-8.9)           | 10.2 (8.8-11.6) | 6.1 (5.2-6.9) |

- 2001-2018년 사이 당뇨병의 연령표준화 유병률은 남성에서 2.8% 증가하였으나, 여성에서는 0.1% 감소하였음

· 자료원: 국민건강영양조사 (2001-2018)  
· 대상자: 20세 이상 국민건강영양조사 원료자  
· 분석 내용: 연도 및 성별로 당뇨병의 유병률, 연령표준화 유병률 및 이의 95% 신뢰구간을 추정함  
· 당뇨병 정의: ① 공복혈당이 126 mg/dL 이상이거나, ② 경구용 혈당강하제 복용 또는 인슐린 치료중인 경우  
· 연령표준화: 2005년도 추계인구 기준 직접표준화



## 고콜레스테롤혈증 유병률 변화

| 연도   | 유병률, % (95% 신뢰구간) |                  |                  |
|------|-------------------|------------------|------------------|
|      | 전체                | 남성               | 여성               |
| 2005 | 6.4 (5.6-7.2)     | 5.9 (4.8-7.0)    | 6.8 (5.7-7.9)    |
| 2007 | 9.0 (7.8-10.3)    | 8.0 (6.1-9.8)    | 10.1 (8.2-11.9)  |
| 2008 | 9.6 (8.7-10.4)    | 8.4 (7.2-9.6)    | 10.7 (9.6-11.8)  |
| 2009 | 10.3 (9.4-11.2)   | 9.3 (8.2-10.5)   | 11.2 (10.0-12.5) |
| 2010 | 11.9 (10.9-12.9)  | 11.2 (9.7-12.7)  | 12.6 (11.2-13.9) |
| 2011 | 12.5 (11.4-13.5)  | 11.1 (9.4-12.9)  | 13.7 (12.4-15.1) |
| 2012 | 13.3 (12.1-14.4)  | 10.9 (9.3-12.4)  | 15.7 (13.9-17.4) |
| 2013 | 13.7 (12.6-14.8)  | 12.0 (10.7-13.3) | 15.4 (13.7-17.1) |
| 2014 | 13.2 (11.9-14.4)  | 12.0 (10.4-13.7) | 14.3 (12.8-15.8) |
| 2015 | 16.8 (15.6-18.1)  | 14.9 (13.2-16.6) | 18.7 (17.1-20.3) |
| 2016 | 19.4 (18.0-20.7)  | 18.1 (16.2-20.0) | 20.6 (19.0-22.3) |
| 2017 | 20.9 (19.5-22.2)  | 18.9 (17.0-20.7) | 22.9 (21.1-24.6) |
| 2018 | 20.7 (19.4-22.1)  | 19.0 (17.1-21.0) | 22.4 (20.8-24.1) |

- 2014-2018년 사이 고콜레스테롤혈증의 유병률은 남성에서 7.0%, 여성에서 8.1% 증가하였음



## 고콜레스테롤혈증 연령표준화 유병률 변화

| 연도   | 연령표준화 유병률, % (95% 신뢰구간) |                  |                  |
|------|-------------------------|------------------|------------------|
|      | 전체                      | 남성               | 여성               |
| 2005 | 6.4 (5.6-7.2)           | 5.9 (4.8-7.0)    | 6.7 (5.6-7.7)    |
| 2007 | 8.8 (7.6-10.1)          | 7.9 (6.1-9.7)    | 9.4 (7.6-11.1)   |
| 2008 | 9.2 (8.4-10.0)          | 8.3 (7.1-9.5)    | 9.7 (8.8-10.7)   |
| 2009 | 9.7 (8.9-10.5)          | 9.1 (8.0-10.2)   | 10.2 (9.1-11.3)  |
| 2010 | 11.0 (10.1-12.0)        | 10.6 (9.2-12.1)  | 11.0 (9.8-12.1)  |
| 2011 | 11.6 (10.6-12.5)        | 10.8 (9.1-12.4)  | 12.2 (11.0-13.4) |
| 2012 | 12.1 (11.1-13.2)        | 10.5 (9.0-12.0)  | 13.5 (12.0-15.0) |
| 2013 | 12.5 (11.6-13.5)        | 11.8 (10.5-13.2) | 12.9 (11.6-14.2) |
| 2014 | 11.8 (10.7-12.8)        | 11.2 (9.6-12.8)  | 12.1 (10.9-13.3) |
| 2015 | 15.0 (13.8-16.1)        | 14.3 (12.6-16.0) | 15.3 (14.0-16.7) |
| 2016 | 16.9 (15.7-18.1)        | 16.7 (14.9-18.4) | 16.8 (15.5-18.1) |
| 2017 | 18.4 (17.2-19.6)        | 17.7 (15.9-19.6) | 18.6 (17.3-20.0) |
| 2018 | 18.0 (16.6-19.3)        | 18.0 (15.9-20.1) | 17.4 (16.1-18.8) |

- 2014-2018년 사이 고콜레스테롤혈증의 연령표준화 유병률은 남성에서 6.8%, 여성에서 5.3% 증가하였음
- 남/녀의 고콜레스테롤혈증 유병률의 차이는 매년 2~4% 전후로 일정하게 유지되고 있음

· 자료원: 국민건강영양조사 (2005-2018)  
· 대상자: 20세 이상 국민건강영양조사 원료자  
· 분석 내용: 연도 및 성별로 고콜레스테롤혈증의 유병률, 연령표준화 유병률 및 95% 신뢰구간을 추정함  
· 고콜레스테롤혈증 정의: ① 총콜레스테롤이 240 mg/dL 이상이거나, ② 콜레스테롤 강하제를 복용하는 경우  
· 연령표준화: 2005년도 추계인구 기준 직접표준화



## 이상지질혈증 유병률 변화

| 연도   | 유병률, % (95% 신뢰구간) |                  |                  |
|------|-------------------|------------------|------------------|
|      | 전체                | 남성               | 여성               |
| 2005 | 41.2 (39.4-42.9)  | 51.3 (48.5-54.1) | 31.3 (29.2-33.4) |
| 2007 | 34.1 (32.1-36.1)  | 41.3 (38.1-44.6) | 27.0 (24.9-29.2) |
| 2008 | 35.4 (33.8-36.9)  | 43.5 (41.2-45.8) | 27.4 (25.6-29.2) |
| 2009 | 36.6 (35.3-38.0)  | 44.2 (42.0-46.3) | 29.3 (27.5-31.1) |
| 2010 | 35.9 (34.5-37.4)  | 45.4 (42.9-48.0) | 26.6 (24.8-28.4) |
| 2011 | 33.7 (32.2-35.2)  | 41.0 (38.6-43.3) | 26.5 (24.7-28.4) |
| 2012 | 31.9 (30.3-33.5)  | 36.7 (34.3-39.0) | 27.2 (25.5-29.0) |
| 2013 | 32.0 (30.6-33.4)  | 39.5 (37.3-41.7) | 24.6 (23.0-26.2) |
| 2014 | 30.7 (29.1-32.3)  | 39.5 (37.3-41.7) | 22.1 (20.3-24.0) |
| 2015 | 34.7 (33.1-36.2)  | 42.4 (39.9-44.9) | 27.0 (25.4-28.7) |
| 2016 | 38.7 (37.1-40.4)  | 45.9 (43.7-48.2) | 31.6 (29.6-33.6) |
| 2017 | 38.2 (36.7-39.6)  | 45.4 (43.3-47.4) | 31.1 (29.1-33.1) |
| 2018 | 38.3 (36.8-39.8)  | 45.4 (43.2-47.5) | 31.2 (29.4-33.1) |

- 2014-2018년 사이 이상지질혈증의 유병률은 남성에서 5.9%, 여성에서 9.1% 증가하였음





## 이상지질혈증 연령표준화 유병률 변화

| 연도   | 연령표준화 유병률, % [95% 신뢰구간] |                  |                  |
|------|-------------------------|------------------|------------------|
|      | 전체                      | 남성               | 여성               |
| 2005 | 41.2 [39.5-42.8]        | 51.2 [48.5-53.9] | 30.7 [28.7-32.8] |
| 2007 | 33.7 [31.7-35.7]        | 41.2 [38.0-44.5] | 25.6 [23.6-27.6] |
| 2008 | 34.6 [33.2-36.0]        | 43.2 [41.1-45.3] | 25.6 [24.1-27.1] |
| 2009 | 35.8 [34.5-37.0]        | 43.7 [41.6-45.8] | 27.5 [25.8-29.1] |
| 2010 | 34.8 [33.3-36.3]        | 44.8 [42.2-47.3] | 24.4 [22.6-26.1] |
| 2011 | 32.3 [30.8-33.8]        | 40.3 [37.9-42.6] | 23.9 [22.2-25.6] |
| 2012 | 30.3 [28.8-31.9]        | 35.8 [33.4-38.2] | 24.5 [22.8-26.1] |
| 2013 | 30.2 [28.8-31.5]        | 38.3 [36.2-40.4] | 21.7 [20.3-23.1] |
| 2014 | 29.0 [27.5-30.6]        | 38.4 [36.2-40.7] | 19.1 [17.4-20.8] |
| 2015 | 32.3 [30.7-33.8]        | 41.4 [38.7-44.0] | 22.6 [21.1-24.1] |
| 2016 | 36.0 [34.5-37.6]        | 44.6 [42.3-46.8] | 26.9 [25.2-28.6] |
| 2017 | 35.1 [33.7-36.5]        | 43.9 [41.8-46.1] | 25.5 [24.0-27.1] |
| 2018 | 35.2 [33.7-36.7]        | 43.9 [41.7-46.2] | 25.7 [24.1-27.3] |

- 2014-2018년 사이 이상지질혈증의 연령표준화 유병률은 남성에서 5.5%, 여성에서 6.6% 증가하였음
- 남/녀의 이상지질혈증 유병률의 차이는 매년 15~20% 전후로 일정하게 유지되고 있음

· 자료원: 국민건강영양조사 (2005-2018)  
· 대상자: 20세 이상 국민건강영양조사 원료자  
· 분석 내용: 연도 및 성별로 이상지질혈증의 유병률, 연령표준화 유병률 및 이의 95% 신뢰구간을 추정함  
· 이상지질혈증 정의: ① LDL 콜레스테롤이 160 mg/dL 이상이거나, ② 중성지방이 200 mg/dL 이상이거나, ③ HDL 콜레스테롤이 40 mg/dL 미만이거나, ④ 콜레스테롤 강하제를 복용하는 경우  
· 연령표준화: 2005년도 추계인구 기준 직접표준화



## 비만 유병률 변화

| 연도   | 유병률, % (95% 신뢰구간) |                  |                  |
|------|-------------------|------------------|------------------|
|      | 전체                | 남성               | 여성               |
| 1998 | 26.1 (24.9-27.4)  | 26.0 (24.0-27.9) | 26.3 (24.7-27.9) |
| 2001 | 30.6 (29.1-32.1)  | 32.4 (30.3-34.5) | 29.3 (27.4-31.1) |
| 2005 | 31.6 (29.9-33.2)  | 35.1 (32.6-37.6) | 28.0 (25.9-30.1) |
| 2007 | 32.4 (30.1-34.6)  | 36.7 (33.3-40.1) | 28.1 (25.8-30.5) |
| 2008 | 31.3 (29.8-32.8)  | 36.1 (34.0-38.3) | 26.6 (24.7-28.5) |
| 2009 | 31.8 (30.5-33.2)  | 36.0 (34.0-38.0) | 27.8 (25.9-29.6) |
| 2010 | 31.6 (30.1-33.0)  | 36.6 (34.3-39.0) | 26.6 (24.8-28.5) |
| 2011 | 32.1 (30.5-33.8)  | 35.4 (32.9-37.9) | 28.9 (26.9-30.8) |
| 2012 | 33.1 (31.4-34.9)  | 36.2 (33.8-38.6) | 30.1 (27.7-32.5) |
| 2013 | 32.6 (31.2-34.1)  | 37.9 (35.6-40.2) | 27.5 (25.7-29.2) |
| 2014 | 31.8 (30.2-33.4)  | 38.0 (35.7-40.3) | 25.7 (23.6-27.9) |
| 2015 | 34.5 (32.9-36.0)  | 40.0 (37.6-42.3) | 29.1 (27.1-31.1) |
| 2016 | 35.6 (33.9-37.4)  | 41.8 (39.3-44.2) | 29.6 (27.6-31.6) |
| 2017 | 35.0 (33.4-36.5)  | 41.4 (39.3-43.5) | 28.6 (26.6-30.6) |
| 2018 | 35.4 (33.8-37.0)  | 42.3 (39.9-44.7) | 28.5 (26.7-30.4) |

- 1998-2018년 사이 비만의 유병률은 남성에서 16.3%, 여성에서 2.2% 증가하였음



## 비만 연령표준화 유병률 변화

| 연도   | 연령표준화 유병률, % (95% 신뢰구간) |                  |                  |
|------|-------------------------|------------------|------------------|
|      | 전체                      | 남성               | 여성               |
| 1998 | 26.3 [25.1-27.5]        | 25.4 [23.5-27.2] | 26.6 [25.1-28.1] |
| 2001 | 29.6 [28.1-31.0]        | 32.4 [30.3-34.5] | 27.6 [25.9-29.3] |
| 2005 | 31.5 [29.9-33.1]        | 34.9 [32.5-37.3] | 27.5 [25.5-29.4] |
| 2007 | 32.1 [29.9-34.3]        | 36.4 [33.1-39.7] | 26.9 [24.7-29.2] |
| 2008 | 31.0 [29.5-32.5]        | 35.8 [33.7-37.9] | 25.6 [23.7-27.4] |
| 2009 | 31.3 [30.0-32.7]        | 35.6 [33.7-37.6] | 26.4 [24.6-28.1] |
| 2010 | 31.1 [29.6-32.6]        | 36.6 [34.2-39.0] | 25.1 [23.3-26.8] |
| 2011 | 31.7 [30.0-33.4]        | 35.4 [33.0-37.9] | 27.4 [25.3-29.4] |
| 2012 | 32.8 [31.0-34.6]        | 36.5 [34.1-38.9] | 28.5 [26.1-30.9] |
| 2013 | 31.9 [30.5-33.4]        | 38.0 [35.6-40.3] | 25.1 [23.5-26.7] |
| 2014 | 31.2 [29.5-32.9]        | 38.0 [35.6-40.5] | 23.7 [21.5-25.9] |
| 2015 | 33.6 [31.9-35.2]        | 40.1 [37.7-42.6] | 26.4 [24.5-28.3] |
| 2016 | 35.0 [33.3-36.8]        | 42.2 [39.7-44.8] | 27.1 [25.1-29.0] |
| 2017 | 34.4 [32.7-36.1]        | 41.9 [39.7-44.2] | 26.0 [24.1-28.0] |
| 2018 | 35.1 [33.5-36.7]        | 43.2 [40.7-45.7] | 26.2 [24.4-28.0] |

- 1998-2018년 사이 비만의 연령표준화 유병률은 남성에서 17.8% 증가하였으나, 여성에서는 0.4% 감소하였음

· 자료원: 국민건강영양조사 (1998-2018)  
 · 대상자: 20세 이상 국민건강영양조사 원료자  
 · 분석 내용: 연도 및 성별로 비만의 유병률, 연령표준화 유병률 및 이의 95% 신뢰구간을 추정함  
 · 비만 정의: 체질량지수가 25 kg/m<sup>2</sup> 이상인 경우  
 · 연령표준화: 2005년도 추계인구 기준 직접표준화

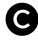

## 현재 흡연율 변화

| 연도   | 흡연율, % (95% 신뢰구간) |                  |               |
|------|-------------------|------------------|---------------|
|      | 전체                | 남성               | 여성            |
| 1998 | 33.2 (32.1-34.3)  | 63.2 (61.3-65.0) | 6.2 (5.2-7.2) |
| 2001 | 25.0 (23.8-26.1)  | 53.6 (51.4-55.9) | 4.6 (3.7-5.4) |
| 2005 | 22.9 (21.5-24.3)  | 42.4 (39.9-45.0) | 3.9 (3.1-4.7) |
| 2007 | 24.5 (22.3-26.7)  | 44.2 (40.4-47.9) | 5.3 (3.8-6.8) |
| 2008 | 27.2 (25.8-28.6)  | 47.6 (45.5-49.7) | 7.2 (6.0-8.3) |
| 2009 | 26.6 (25.3-27.8)  | 46.9 (44.7-49.1) | 6.6 (5.7-7.6) |
| 2010 | 27.0 (25.6-28.4)  | 48.3 (46.0-50.6) | 6.1 (4.9-7.4) |
| 2011 | 26.2 (24.5-27.9)  | 46.8 (44.2-49.5) | 6.2 (5.2-7.3) |
| 2012 | 24.5 (23.0-26.0)  | 42.6 (40.3-45.0) | 7.1 (5.9-8.4) |
| 2013 | 22.4 (20.8-24.0)  | 40.3 (37.5-43.2) | 5.6 (4.5-6.6) |
| 2014 | 22.3 (20.8-23.8)  | 40.8 (38.3-43.2) | 4.7 (3.6-5.7) |
| 2015 | 21.1 (19.7-22.5)  | 37.5 (35.1-39.8) | 5.1 (4.2-6.1) |
| 2016 | 22.2 (20.6-23.9)  | 38.7 (36.1-41.2) | 6.0 (4.8-7.1) |
| 2017 | 20.8 (19.2-22.4)  | 36.8 (34.2-39.5) | 5.0 (4.0-5.9) |
| 2018 | 21.0 (19.6-22.5)  | 35.7 (33.3-38.1) | 6.5 (5.3-7.7) |

- 1998-2018년 사이 현재 흡연율은 남성에서 27.5% 감소하였으나, 여성에서는 0.3% 증가하였음



## 연령표준화 현재 흡연율 변화

| 연도   | 연령표준화 흡연율, % [95% 신뢰구간] |                  |               |
|------|-------------------------|------------------|---------------|
|      | 전체                      | 남성               | 여성            |
| 1998 | 33.1 [31.9-34.3]        | 62.5 [60.6-64.4] | 6.1 [5.2-7.1] |
| 2001 | 25.2 [24.1-26.4]        | 54.6 [52.5-56.8] | 4.3 [3.5-5.1] |
| 2005 | 23.0 [21.6-24.4]        | 42.0 [39.5-44.4] | 3.8 [2.9-4.6] |
| 2007 | 24.8 [22.6-27.0]        | 44.1 [40.5-47.6] | 5.3 [3.7-6.9] |
| 2008 | 27.7 [26.3-29.1]        | 47.7 [45.6-49.7] | 7.4 [6.2-8.6] |
| 2009 | 27.2 [25.9-28.5]        | 47.1 [44.9-49.4] | 6.9 [5.9-7.9] |
| 2010 | 27.7 [26.3-29.1]        | 48.5 [46.3-50.8] | 6.3 [5.0-7.7] |
| 2011 | 27.0 [25.3-28.7]        | 47.5 [44.9-50.1] | 6.6 [5.4-7.8] |
| 2012 | 25.5 [23.9-27.1]        | 43.2 [40.7-45.6] | 7.7 [6.3-9.1] |
| 2013 | 23.5 [21.7-25.2]        | 41.2 [38.4-44.0] | 6.1 [4.9-7.3] |
| 2014 | 23.4 [21.8-25.0]        | 41.8 [39.2-44.4] | 5.2 [3.9-6.5] |
| 2015 | 22.3 [20.8-23.8]        | 38.7 [36.3-41.1] | 5.5 [4.3-6.6] |
| 2016 | 23.6 [21.9-25.3]        | 40.1 [37.5-42.7] | 6.3 [5.1-7.5] |
| 2017 | 22.1 [20.4-23.9]        | 38.0 [35.1-40.8] | 5.7 [4.5-6.9] |
| 2018 | 22.4 [20.9-23.8]        | 36.6 [34.2-39.1] | 7.5 [6.1-9.0] |

- 1998-2018년 사이 연령표준화 현재 흡연율은 남성에서 25.9% 감소하였으나, 여성에서는 1.4% 증가하였음

· 자료원: 국민건강영양조사 (1998-2018)  
 · 대상자: 20세 이상 국민건강영양조사 원료자  
 · 분석 내용: 연도 및 성별로 흡연율, 연령표준화 흡연율 및 이의 95% 신뢰구간을 추정함  
 · 현재 흡연 정의: 평생 담배를 5갑(100개비) 이상 피웠고, 현재 흡연 중인 경우  
 · 연령표준화: 2005년도 추계인구 기준 직접표준화

# HEART DISEASE FACT SHEET

## 작성 방법

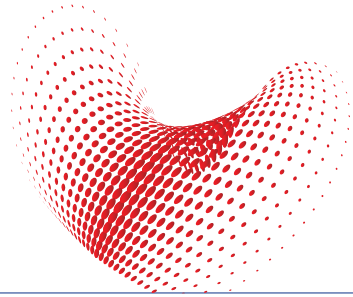

### 순환기질환의 분류

| 항목      | 질병코드 (KCD)                |
|---------|---------------------------|
| 전체순환기질환 | I00-I99                   |
| 심장질환    | I00-I13, I20-I28, I30-I51 |
| 허혈성심질환  | I20-I25                   |
| 급성심근경색증 | I21-I23                   |
| 심부전     | I50                       |
| 고혈압     | I10-I13                   |
| 뇌혈관질환   | I60-I69                   |
| 기타순환기질환 | I15, I52, I70-I99         |

### A 순환기질환에 의한 사망 현황

|       |                                                                                                                                                                                                                                                               |
|-------|---------------------------------------------------------------------------------------------------------------------------------------------------------------------------------------------------------------------------------------------------------------|
| 자료원   | 통계청 사망원인통계 (1983-2018)                                                                                                                                                                                                                                        |
| 분석 대상 | 전 연령 주민등록인구 (일부 신원미상자 포함)                                                                                                                                                                                                                                     |
| 분석 내용 | <ul style="list-style-type: none"><li>· 연도별 전체순환기질환 및 주요 심혈관질환에 의한 사망자 수와 사망률 계산</li><li>· 연도 및 성별 각 순환기질환에 의한 보통사망률과 연령표준화 사망률 계산</li><li>· 연도 및 성·연령별 각 순환기질환에 의한 사망률 계산</li></ul>                                                                          |
| 지표 정의 | <ul style="list-style-type: none"><li>· 순환기질환 사망자 수: 해당 연도에 순환기질환이 원사인으로 보고된 사망자 수</li><li>· 순환기질환 사망률: 연간 순환기질환 사망자 수를 해당 연도 인구 수로 나눈 값</li><li>· 연령표준화 사망률: 연령구조 변화가 사망률에 미치는 영향을 제거하기 위하여, 2018년도 주민등록인구를 표준인구로 하여 직접법으로 보정한 사망률 (남녀 별도 표준인구 적용)</li></ul> |

## B 순환기질환으로 인한 입원 현황

|        |                                                                                                                                                                                                                                                             |
|--------|-------------------------------------------------------------------------------------------------------------------------------------------------------------------------------------------------------------------------------------------------------------|
| 자료원    | 국민건강보험 빅데이터 (2002-2018)                                                                                                                                                                                                                                     |
| 분석 대상  | 20세 이상 건강보험가입자 및 의료급여수급권자                                                                                                                                                                                                                                   |
| 분석 내용  | <ul style="list-style-type: none"> <li>연도별 전체순환기질환, 심장질환 및 뇌혈관질환으로 인한 입원환자 수 계산</li> <li>연도별 전체순환기질환 및 주요 심혈관질환으로 인한 입원율과 연령표준화 입원율 계산</li> </ul>                                                                                                           |
| 분석 방법* | <ul style="list-style-type: none"> <li>순환기질환 입원환자 수: 해당 연도에 순환기질환을 진단명으로 1회 이상 입원한 환자 수</li> <li>순환기질환 입원율: 순환기질환 입원환자 수를 해당 연도 건강보험 대상 인구 수로 나눈 값</li> <li>연령표준화 입원율: 연령구조 변화가 입원율에 미치는 영향을 제거하기 위하여, 2018년도 건강보험 대상 인구를 표준인구로 하여 직접법으로 보정한 입원율</li> </ul> |

\*순환기질환이 주진단인 경우 (주상병 기준)와 주진단 혹은 기타진단인 경우 (전체상병 기준) 두 가지로 계산

## C 주요 순환기질환 위험요인 유병 현황

|         |                                                                                                                                                                                                                                                                                 |                                                                                                          |
|---------|---------------------------------------------------------------------------------------------------------------------------------------------------------------------------------------------------------------------------------------------------------------------------------|----------------------------------------------------------------------------------------------------------|
| 자료원     | 국민건강영양조사 (1998-2018)                                                                                                                                                                                                                                                            |                                                                                                          |
| 분석 대상   | 20세 이상 국민건강영양조사 완료자                                                                                                                                                                                                                                                             |                                                                                                          |
| 분석 내용   | <ul style="list-style-type: none"> <li>2018년도 주요 순환기질환 위험요인들의 유병자 수 추정</li> <li>2018년도 성·연령별 주요 순환기질환 위험요인 개수의 분포 추정</li> <li>각 위험요인의 연도별 유병률 및 연령표준화 유병률 추정</li> </ul>                                                                                                         |                                                                                                          |
| 분석 방법   | <ul style="list-style-type: none"> <li>유병자 수: 국민건강영양조사에서 부여한 표본별 가중치를 이용해 계산한 가중 유병률을 2018년도 20세 이상 추계인구 수에 곱하여 산출</li> <li>위험요인 유병률: 국민건강영양조사에서 부여한 표본별 가중치를 이용해 산출한 가중 유병률</li> <li>연령표준화 유병률: 연령구조 변화가 유병률에 미치는 영향을 제거하기 위하여, 2005년도 추계인구를 표준인구로 하여 직접법으로 보정한 유병률</li> </ul> |                                                                                                          |
| 위험요인 정의 | 고혈압                                                                                                                                                                                                                                                                             | ① 수축기혈압이 140 mmHg 이상이거나, ② 이완기혈압이 90 mmHg 이상이거나, ③ 고혈압 약물을 복용하는 경우                                       |
|         | 당뇨병                                                                                                                                                                                                                                                                             | ① 공복혈당이 126 mg/dL 이상이거나, ② 경구용 혈당강하제 복용 또는 인슐린 치료중인 경우                                                   |
|         | 고콜레스테롤혈증                                                                                                                                                                                                                                                                        | ① 총콜레스테롤이 240 mg/dL 이상이거나, ② 콜레스테롤 강하제를 복용하는 경우                                                          |
|         | 이상지질혈증                                                                                                                                                                                                                                                                          | ① LDL 콜레스테롤이 160 mg/dL 이상이거나, ② 중성지방이 200 mg/dL 이상이거나, ③ HDL 콜레스테롤이 40 mg/dL 미만이거나, ④ 콜레스테롤 강하제를 복용하는 경우 |
|         | 비만                                                                                                                                                                                                                                                                              | 체질량지수가 25.0 kg/m <sup>2</sup> 이상인 경우                                                                     |
|         | 흡연                                                                                                                                                                                                                                                                              | 평생 담배를 5갑(100개비) 이상 피웠고, 현재 흡연 중인 경우                                                                     |

# HEART DISEASE FACT SHEET 2020

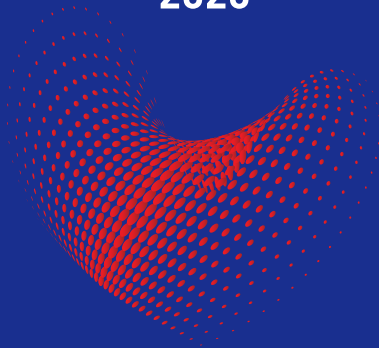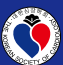

**대한심장학회**  
The Korean Society of Cardiology

[www.circulation.or.kr](http://www.circulation.or.kr)

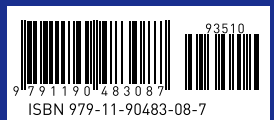

93510  
9 791190 483087  
ISBN 979-11-90483-08-7
